# Supplementary material for: Comparative transcriptomic insights into the domestication of Pleurotus abieticola for coniferous cultivation
Source: Front Mol Biosci. 2024 Jan 10;10:1352163. doi: 10.3389/fmolb.2023.1352163 (PMC10805826; doi:10.3389/fmolb.2023.1352163)
Supplement: Supplementary file 3 [file Table4.XLSX]

## Sheet: Sheet1
Supplementary Table 4 119 DEGs of P. abieticola mycelia cultivated in different substrates
Gene ID	KUO FPKM	SONG FPKM	log2(SONG/KUO)	Cazymes	Nr	Nt	Swissprot	KEGG	COG	TrEMBL	Interpro	GO
PA_10001488	399.85	102.94	-1.82711	AA1	gi|15594026|emb|CAC69853.1|/0/laccase [Pleurotus ostreatus]	gi|67508840|emb|AJ973225.1|/0.0/Pleurotus sapidus mRNA for laccase2 (lac2 gene)	Q12542/0.0/LAC2_AGABI Laccase-2 OS=Agaricus bisporus GN=lcc2 PE=1 SV=1	hir:HETIRDRAFT_482867/0.0/lcc6; laccase isoform 1; K19791 iron transport multicopper oxidase	YMR058w/1e-55/---	Q96TR4/0.0/Q96TR4_PLEOS Laccase OS=Pleurotus ostreatus GN=poxa3 PE=4 SV=1	PF07732/7.9E-26/Multicopper oxidase	NA
PA_10003423	13.21	3.23	-1.90823	AA1	gi|646305176|gb|KDQ26322.1|/0/laccase [Pleurotus ostreatus PC15]	gi|3006038|emb|AJ005018.1|/0.0/Pleurotus ostreatus mRNA for laccase (poxa1b gene)	Q99046/0.0/LAC2_TRAVI Laccase-2 OS=Trametes villosa GN=LCC2 PE=3 SV=1	cci:CC1G_03946/0.0/laccase 2; K19791 iron transport multicopper oxidase	SPAC1F7.08/1e-51/---	A0A067NQH1/0.0/A0A067NQH1_PLEOS Laccase OS=Pleurotus ostreatus PC15 GN=LACC6 PE=4 SV=1	PF00394/2.7E-35/Multicopper oxidase	biological_process:GO:0055114//oxidation-reduction process;molecular_function:GO:0052716//hydroquinone:oxygen oxidoreductase activity;GO:0005507//copper ion binding;
PA_10003434	217.51	5.20667	-5.24902	AA1	gi|6016834|dbj|BAA85185.1|/0/bilirubin oxidase [Pleurotus ostreatus] &gt;gi|28812189|dbj|BAC65099.1| laccase [Pleurotus ostreatus]	gi|6016833|dbj|AB020026.1|/0.0/Pleurotus ostreatus mRNA for bilirubin oxidase, complete cds	Q12729/0.0/LAC1_PLEOS Laccase-1 OS=Pleurotus ostreatus GN=POX1 PE=2 SV=1	cci:CC1G_03936/3e-136/laccase 2; K19791 iron transport multicopper oxidase	SPAC1F7.08/5e-11/---	Q9UVY4/0.0/Q9UVY4_PLEOS Bilirubin oxidase OS=Pleurotus ostreatus GN=lccK PE=2 SV=1	PF07731/5.6E-14/Multicopper oxidase	biological_process:GO:0055114//oxidation-reduction process;molecular_function:GO:0016491//oxidoreductase activity;GO:0005507//copper ion binding;
PA_10004041	93.71	173.177	1.01877	AA1	gi|646301834|gb|KDQ22985.1|/0/Fet3 ferroxidase [Pleurotus ostreatus PC15]	gi|597981948|ref|XM_007363578.1|/0.0/Dichomitus squalens LYAD-421 SS1 Fet3 protein (DICSQDRAFT_82457), mRNA	Q09920/3e-126/FIO1_SCHPO Iron transport multicopper oxidase fio1 OS=Schizosaccharomyces pombe (strain 972 / ATCC 24843) GN=fio1 PE=3 SV=1	dsq:DICSQDRAFT_82457/0.0/Dsfet3; Fet3 protein; K19791 iron transport multicopper oxidase	SPAC1F7.08/1e-126/---	A0A067N7N9/0.0/A0A067N7N9_PLEOS Fet3 ferroxidase OS=Pleurotus ostreatus PC15 GN=PoFet3 PE=4 SV=1	PF00394/1.4E-34/Multicopper oxidase	NA
PA_10004070	15.23	4.61	-1.59799	AA1	gi|646301844|gb|KDQ22995.1|/0/laccase [Pleurotus ostreatus PC15]	gi|380704396|gb|JQ228450.1|/0.0/Coprinus comatus laccase 1 (lac1) mRNA, complete cds	Q12729/0.0/LAC1_PLEOS Laccase-1 OS=Pleurotus ostreatus GN=POX1 PE=2 SV=1	cci:CC1G_02533/0.0/laccase 3; K19791 iron transport multicopper oxidase	YFL041w/1e-41/---	A0A067N7P7/0.0/A0A067N7P7_PLEOS Laccase OS=Pleurotus ostreatus PC15 GN=PoLACC12 PE=4 SV=1	PF07732/8.6E-34/Multicopper oxidase	NA
PA_10007512	31.6667	5.22	-2.56953	AA1	gi|32399649|emb|CAD45381.1|/0/laccase 5 [Lentinus sajor-caju]	gi|32399648|emb|AJ507328.1|/0.0/Pleurotus sajor-caju mRNA for laccase 5 (lac5 gene)	Q12739/0.0/LAC2_PLEOS Laccase-2 OS=Pleurotus ostreatus GN=POX2 PE=1 SV=1	cci:CC1G_03936/0.0/laccase 2; K19791 iron transport multicopper oxidase	YFL041w/2e-26/---	Q7Z8S2/0.0/Q7Z8S2_PLESA Laccase 5 OS=Pleurotus sajor-caju GN=lac5 PE=2 SV=1	PF07731/1.2E-22/Multicopper oxidase	NA
PA_10001162	52.5233	8.28	-2.53739	AA2	gi|646310892|gb|KDQ32034.1|/0/MnP-short, short manganese peroxidase [Pleurotus ostreatus PC15]	gi|695583930|ref|XM_009555109.1|/1e-158/Heterobasidion irregulare TC 32-1 manganese peroxidase (mnp6), partial mRNA	O94753/1e-139/VPL2_PLEER Versatile peroxidase VPL2 OS=Pleurotus eryngii GN=vpl2 PE=1 SV=1	hir:HETIRDRAFT_108376/4e-158/mnp6; manganese peroxidase; K20205 manganese peroxidase [EC:1.11.1.13]	NA	A0A067NVU8/0.0/A0A067NVU8_PLEOS MnP-short, short manganese peroxidase OS=Pleurotus ostreatus PC15 GN=MnP2 PE=3 SV=1	PF11895/1.2E-27/Domain of unknown function (DUF3415)	biological_process:GO:0050896//response to stimulus;molecular_function:GO:0005488//binding;GO:0016491//oxidoreductase activity;
PA_10005663	40.48	14.61	-1.34084	AA2	gi|4512252|dbj|BAA33009.2|/0/manganese peroxidase [Pleurotus ostreatus]	gi|222154059|gb|FJ594281.1|/0.0/Pleurotus ostreatus strain PC9 manganese peroxidase 3 (mnp3) mRNA, complete cds	Q9UR19/3e-168/VPL1_PLEER Versatile peroxidase VPL1 OS=Pleurotus eryngii GN=vpl1 PE=1 SV=1	mrr:Moror_16339/1e-169/manganese peroxidase; K20205 manganese peroxidase [EC:1.11.1.13]	NA	O74179/0.0/O74179_PLEOS Manganese peroxidase OS=Pleurotus ostreatus GN=mnp3 PE=3 SV=2	PF11895/2.8E-20/Domain of unknown function (DUF3415)	biological_process:GO:0006979//response to oxidative stress;GO:0055114//oxidation-reduction process;molecular_function:GO:0004601//peroxidase activity;GO:0046872//metal ion binding;GO:0020037//heme binding;
PA_10006090	242.897	52.9933	-1.59859	AA2	gi|646306310|gb|KDQ27455.1|/0/cytochrome c peroxidase [Pleurotus ostreatus PC15]	gi|630214571|ref|XM_007858001.1|/0.0/Moniliophthora roreri MCA 2997 cytochrome c peroxidase partial mRNA	Q6URB0/1e-149/CCPR_CRYNH Cytochrome c peroxidase, mitochondrial OS=Cryptococcus neoformans var. grubii serotype A (strain H99 / ATCC 208821 / CBS 10515 / FGSC 9487) GN=CCP1 PE=3 SV=1	mrr:Moror_6159/0.0/cytochrome c peroxidase; K00428 cytochrome c peroxidase [EC:1.11.1.5]	YKR066c/7e-78/---	A0A067NK95/0.0/A0A067NK95_PLEOS Cytochrome c peroxidase OS=Pleurotus ostreatus PC15 GN=CCP PE=3 SV=1	PF00141/9.8E-47/Peroxidase	biological_process:GO:0006979//response to oxidative stress;GO:0055114//oxidation-reduction process;molecular_function:GO:0046872//metal ion binding;GO:0004601//peroxidase activity;GO:0020037//heme binding;
PA_10000143	25.1033	0.323333	-6.21478	AA3	gi|646301763|gb|KDQ22914.1|/0/hypothetical protein PLEOSDRAFT_1110004 [Pleurotus ostreatus PC15]	gi|630358076|ref|XM_007870148.1|/0.0/Gloeophyllum trabeum ATCC 11539 alcohol oxidase partial mRNA	P04842/3e-158/ALOX1_PICPG Alcohol oxidase 1 OS=Komagataella pastoris (strain GS115 / ATCC 20864) GN=AOX1 PE=1 SV=2	gtr:GLOTRDRAFT_139980/0.0/alcohol oxidase; K17066 alcohol oxidase [EC:1.1.3.13]	CC0945/1e-27/---	A0A067N510/0.0/A0A067N510_PLEOS Uncharacterized protein OS=Pleurotus ostreatus PC15 GN=PLEOSDRAFT_1110004 PE=3 SV=1	PF00732/3.9E-37/GMC oxidoreductase	molecular_function:GO:0016614//oxidoreductase activity, acting on CH-OH group of donors;
PA_10000618	5.27667	10.6667	1.13456	AA3	gi|646301525|gb|KDQ22676.1|/0/hypothetical protein PLEOSDRAFT_1109776 [Pleurotus ostreatus PC15]	gi|630219259|ref|XM_007859521.1|/0.0/Moniliophthora roreri MCA 2997 aryl-alcohol oxidase partial mRNA	Q3L245/2e-137/PDH1_LEUMG Pyranose dehydrogenase 1 OS=Leucoagaricus meleagris GN=pdh1 PE=1 SV=1	mrr:Moror_9284/0.0/aryl-alcohol oxidase; K00108 choline dehydrogenase [EC:1.1.99.1]	SMc04390/3e-71/---	A0A067NFX1/0.0/A0A067NFX1_PLEOS Uncharacterized protein OS=Pleurotus ostreatus PC15 GN=PLEOSDRAFT_1109776 PE=4 SV=1	PF00732/2.1E-62/GMC oxidoreductase	NA
PA_10002510	119.627	17.5433	-2.33089	AA3	gi|646302866|gb|KDQ24015.1|/0/hypothetical protein PLEOSDRAFT_174637 [Pleurotus ostreatus PC15]	gi|636628674|ref|XM_008047281.1|/0.0/Trametes versicolor FP-101664 SS1 aryl-alcohol oxidase-like protein partial mRNA	Q3L1D1/2e-117/PDH1_AGABI Pyranose dehydrogenase OS=Agaricus bisporus GN=pdh1 PE=1 SV=1	hir:HETIRDRAFT_66113/0.0/aao4; aryl-alcohol oxidase 4; K00108 choline dehydrogenase [EC:1.1.99.1]	mll1008/5e-76/---	A0A067NAM5/0.0/A0A067NAM5_PLEOS Uncharacterized protein OS=Pleurotus ostreatus PC15 GN=PLEOSDRAFT_174637 PE=3 SV=1	PF05199/1.8E-28/GMC oxidoreductase	NA
PA_10004146	88.1767	27.91	-1.5264	AA3	gi|646301135|gb|KDQ22286.1|/0/hypothetical protein PLEOSDRAFT_1109402 [Pleurotus ostreatus PC15]	gi|302675265|ref|XM_003027271.1|/1e-169/Schizophyllum commune H4-8 alcohol oxidase-like protein, mRNA	P04841/9e-101/ALOX_PICAN Alcohol oxidase OS=Pichia angusta GN=MOX PE=1 SV=1	scm:SCHCODRAFT_258678/3e-169/alcohol oxidase-like protein; K17066 alcohol oxidase [EC:1.1.3.13]	SMb20496/4e-29/---	A0A067NEU2/0.0/A0A067NEU2_PLEOS Uncharacterized protein OS=Pleurotus ostreatus PC15 GN=PLEOSDRAFT_1109402 PE=3 SV=1	PF00732/8.1E-15/GMC oxidoreductase	NA
PA_10007388	6.01	2.57	-1.09697	AA3	gi|646307695|gb|KDQ28839.1|/0/hypothetical protein PLEOSDRAFT_50038 [Pleurotus ostreatus PC15]	gi|820947056|emb|LN830265.1|/0.0/Pleurotus sapidus mRNA for aryl alcohol oxidase (AAO gene), strain 8826	Q3L243/1e-119/PDH2_LEUMG Pyranose dehydrogenase 2 OS=Leucoagaricus meleagris GN=pdh2 PE=2 SV=1	hir:HETIRDRAFT_66113/2e-151/aao4; aryl-alcohol oxidase 4; K00108 choline dehydrogenase [EC:1.1.99.1]	RSc3345/2e-79/---	A0A067NLR5/0.0/A0A067NLR5_PLEOS Uncharacterized protein OS=Pleurotus ostreatus PC15 GN=PLEOSDRAFT_50038 PE=3 SV=1	PF00732/1.0E-62/GMC oxidoreductase	NA
PA_10007930	49.1067	181.21	1.99147	AA3	gi|646311613|gb|KDQ32754.1|/0/hypothetical protein PLEOSDRAFT_1087553, partial [Pleurotus ostreatus PC15]	gi|598002972|ref|XM_007369033.1|/0.0/Dichomitus squalens LYAD-421 SS1 aryl-alcohol oxidase-like protein (DICSQDRAFT_182736), partial mRNA	Q3L245/2e-115/PDH1_LEUMG Pyranose dehydrogenase 1 OS=Leucoagaricus meleagris GN=pdh1 PE=1 SV=1	hir:HETIRDRAFT_66113/3e-166/aao4; aryl-alcohol oxidase 4; K00108 choline dehydrogenase [EC:1.1.99.1]	RSc3345/5e-79/---	A0A067NXW0/0.0/A0A067NXW0_PLEOS Uncharacterized protein (Fragment) OS=Pleurotus ostreatus PC15 GN=PLEOSDRAFT_1087553 PE=3 SV=1	PF00732/7.7E-57/GMC oxidoreductase	NA
PA_10007931	9.35333	17.1033	1.00455	AA3	gi|646311612|gb|KDQ32753.1|/0/hypothetical protein PLEOSDRAFT_1098737 [Pleurotus ostreatus PC15]	gi|598002972|ref|XM_007369033.1|/0.0/Dichomitus squalens LYAD-421 SS1 aryl-alcohol oxidase-like protein (DICSQDRAFT_182736), partial mRNA	Q3L245/7e-122/PDH1_LEUMG Pyranose dehydrogenase 1 OS=Leucoagaricus meleagris GN=pdh1 PE=1 SV=1	hir:HETIRDRAFT_66113/5e-176/aao4; aryl-alcohol oxidase 4; K00108 choline dehydrogenase [EC:1.1.99.1]	mll1008/4e-89/---	A0A067NXG1/0.0/A0A067NXG1_PLEOS Uncharacterized protein OS=Pleurotus ostreatus PC15 GN=PLEOSDRAFT_1098737 PE=3 SV=1	PF00732/9.5E-59/GMC oxidoreductase	NA
PA_10007959	97.4667	25.73	-1.7867	AA3	gi|646311683|gb|KDQ32824.1|/0/hypothetical protein PLEOSDRAFT_172616 [Pleurotus ostreatus PC15]	gi|939535448|gb|KR296953.1|/1e-111/Irpex lacteus strain CD2 clone comp8866_c0 choline dehydrogenase mRNA, complete cds	Q0R4L2/3e-57/PDH3_LEUMG Pyranose dehydrogenase 3 OS=Leucoagaricus meleagris GN=pdh3 PE=2 SV=1	dsq:DICSQDRAFT_134737/3e-61/GMC oxidoreductase; K00108 choline dehydrogenase [EC:1.1.99.1]	mll3225/2e-57/---	A0A067NY81/0.0/A0A067NY81_PLEOS Uncharacterized protein OS=Pleurotus ostreatus PC15 GN=PLEOSDRAFT_172616 PE=3 SV=1	PF05199/3.2E-28/GMC oxidoreductase	NA
PA_10008077	3.64	26.26	2.9868	AA3	gi|646311812|gb|KDQ32953.1|/0/hypothetical protein PLEOSDRAFT_1032666 [Pleurotus ostreatus PC15]	gi|630191160|ref|XM_007850400.1|/0.0/Moniliophthora roreri MCA 2997 aryl-alcohol oxidase partial mRNA	V5NDL4/7e-129/PDH1_AGACM Pyranose dehydrogenase OS=Agaricus campestris GN=pdh1 PE=1 SV=1	mrr:Moror_9284/2e-177/aryl-alcohol oxidase; K00108 choline dehydrogenase [EC:1.1.99.1]	mll1008/2e-75/---	A0A067NY08/0.0/A0A067NY08_PLEOS Uncharacterized protein OS=Pleurotus ostreatus PC15 GN=PLEOSDRAFT_1032666 PE=4 SV=1	PF00732/1.1E-61/GMC oxidoreductase	NA
PA_10009315	474.777	2106.02	1.92007	AA3	gi|646310349|gb|KDQ31492.1|/0/hypothetical protein PLEOSDRAFT_1088797 [Pleurotus ostreatus PC15]	gi|597979802|ref|XM_007363027.1|/0.0/Dichomitus squalens LYAD-421 SS1 GMC oxidoreductase (DICSQDRAFT_167452), partial mRNA	Q8BJ64/8e-73/CHDH_MOUSE Choline dehydrogenase, mitochondrial OS=Mus musculus GN=Chdh PE=1 SV=1	cci:CC1G_07595/3e-73/choline dehydrogenase; K00108 choline dehydrogenase [EC:1.1.99.1]	mll3225/2e-66/---	A0A067P501/0.0/A0A067P501_PLEOS Uncharacterized protein OS=Pleurotus ostreatus PC15 GN=PLEOSDRAFT_1088797 PE=3 SV=1	PF05199/7.2E-29/GMC oxidoreductase	NA
PA_10001421	39.5033	109.003	1.59799	AA5	gi|646303223|gb|KDQ24371.1|/0/hypothetical protein PLEOSDRAFT_1078518 [Pleurotus ostreatus PC15]	gi|636608212|ref|XM_008037050.1|/0.0/Trametes versicolor FP-101664 SS1 glyoxal oxidase precursor partial mRNA	D4AUF1/1e-42/WSCD1_ARTBC WSC domain-containing protein ARB_07867 OS=Arthroderma benhamiae (strain ATCC MYA-4681 / CBS 112371) GN=ARB_07867 PE=1 SV=1	pcs:Pc21g18600/2e-11/Pc21g18600; K04618 galactose oxidase [EC:1.1.3.9]	NA	A0A067NLA5/0.0/A0A067NLA5_PLEOS Uncharacterized protein OS=Pleurotus ostreatus PC15 GN=PLEOSDRAFT_1078518 PE=4 SV=1	PF09118/1.8E-21/Domain of unknown function (DUF1929)	NA
PA_10002827	35.2167	14.9067	-1.11127	AA5	gi|646305827|gb|KDQ26973.1|/0/hypothetical protein PLEOSDRAFT_1093866 [Pleurotus ostreatus PC15]	gi|595781591|ref|XM_007269277.1|/0.0/Fomitiporia mediterranea MF3/22 copper radical oxidase (FOMMEDRAFT_142411), partial mRNA	D4AUF1/0.0/WSCD1_ARTBC WSC domain-containing protein ARB_07867 OS=Arthroderma benhamiae (strain ATCC MYA-4681 / CBS 112371) GN=ARB_07867 PE=1 SV=1	lbc:LACBIDRAFT_318804/4e-12/glycoside hydrolase family 71 protein; K08254 glucan endo-1,3-alpha-glucosidase [EC:3.2.1.59]	TM0024/6e-20/---	A0A067NG07/0.0/A0A067NG07_PLEOS Uncharacterized protein OS=Pleurotus ostreatus PC15 GN=PLEOSDRAFT_1093866 PE=4 SV=1	PF00722/1.1E-16/Glycosyl hydrolases family 16	NA
PA_10004205	11.45	21.51	1.0245	AA5	gi|646301062|gb|KDQ22213.1|/0/hypothetical protein PLEOSDRAFT_1109334 [Pleurotus ostreatus PC15]	gi|630190576|ref|XM_007850207.1|/0.0/Moniliophthora roreri MCA 2997 copper radical oxidase partial mRNA	D4AUF1/5e-29/WSCD1_ARTBC WSC domain-containing protein ARB_07867 OS=Arthroderma benhamiae (strain ATCC MYA-4681 / CBS 112371) GN=ARB_07867 PE=1 SV=1	val:VDBG_09605/2e-16/galactose oxidase; K04618 galactose oxidase [EC:1.1.3.9]	NA	A0A067N2G6/0.0/A0A067N2G6_PLEOS Uncharacterized protein OS=Pleurotus ostreatus PC15 GN=PLEOSDRAFT_1109334 PE=4 SV=1	PF07250/8.6E-52/Glyoxal oxidase N-terminus	NA
PA_10010484	21.41	44.4933	1.1965	AA7	gi|646309083|gb|KDQ30226.1|/0/hypothetical protein PLEOSDRAFT_1101230 [Pleurotus ostreatus PC15]	gi|597911904|ref|XM_007303189.1|/1e-122/Stereum hirsutum FP-91666 SS1 FAD-binding domain-containing protein (STEHIDRAFT_56628), partial mRNA	P30986/2e-23/RETO_ESCCA Reticuline oxidase OS=Eschscholzia californica GN=BBE1 PE=1 SV=1	aje:HCAG_01147/2e-07/cysteine desulfurase, mitochondrial precursor; K04487 cysteine desulfurase [EC:2.8.1.7]	BS_yvdP/3e-23/---	A0A067P2Y7/0.0/A0A067P2Y7_PLEOS Uncharacterized protein OS=Pleurotus ostreatus PC15 GN=PLEOSDRAFT_1101230 PE=4 SV=1	PF08031/1.0E-11/Berberine and berberine like	NA
PA_10002246	35.3467	0.863333	-5.1861	AA9	gi|646302547|gb|KDQ23696.1|/6.52811e-137/glycoside hydrolase family 61 protein [Pleurotus ostreatus PC15]	gi|630208389|ref|XM_007856001.1|/1e-116/Moniliophthora roreri MCA 2997 glycoside hydrolase family 61 protein partial mRNA	Q4WBU0/3e-24/EGLD_ASPFU Probable endo-beta-1,4-glucanase D OS=Neosartorya fumigata (strain ATCC MYA-4609 / Af293 / CBS 101355 / FGSC A1100) GN=eglD PE=3 SV=1	sla:SERLADRAFT_335267/2e-34/glycoside hydrolase family 61 protein; K19356 cellulase [EC:3.2.1.4]	NA	A0A067NIV2/2e-136/A0A067NIV2_PLEOS Glycoside hydrolase family 61 protein OS=Pleurotus ostreatus PC15 GN=PLEOSDRAFT_1048891 PE=4 SV=1	PF03443/9.2E-48/Glycosyl hydrolase family 61	molecular_function:GO:0016787//hydrolase activity;
PA_10005852	52.54	13.4433	-1.83189	AA9	gi|646306604|gb|KDQ27749.1|/9.96825e-154/glycoside hydrolase family 61 protein, partial [Pleurotus ostreatus PC15]	gi|630177193|ref|XM_007845912.1|/4e-81/Moniliophthora roreri MCA 2997 endoglucanase iv precursor partial mRNA	G2Q9T3/1e-42/CEL61_MYCTT Polysaccharide monooxygenase Cel61a OS=Myceliophthora thermophila (strain ATCC 42464 / BCRC 31852 / DSM 1799) GN=Cel61a PE=1 SV=1	afm:AFUA_3G03870/7e-36/endo-1,4-beta-glucanase (EC:3.2.1.4); K01179 endoglucanase [EC:3.2.1.4]	NA	A0A067NIQ6/3e-153/A0A067NIQ6_PLEOS Glycoside hydrolase family 61 protein (Fragment) OS=Pleurotus ostreatus PC15 GN=PLEOSDRAFT_6958 PE=4 SV=1	PF03443/1.1E-56/Glycosyl hydrolase family 61	NA
PA_10006543	295.21	94.7267	-1.52105	AA9	gi|646308593|gb|KDQ29737.1|/3.38687e-141/glycoside hydrolase family 61 protein [Pleurotus ostreatus PC15]	gi|630189423|ref|XM_007849846.1|/1e-129/Moniliophthora roreri MCA 2997 glycoside hydrolase family 61 protein partial mRNA	Q5BCX8/7e-61/EGLD_EMENI Endo-beta-1,4-glucanase D OS=Emericella nidulans (strain FGSC A4 / ATCC 38163 / CBS 112.46 / NRRL 194 / M139) GN=eglD PE=1 SV=1	mrr:Moror_16033/3e-129/glycoside hydrolase family 61 protein; K19356 cellulase [EC:3.2.1.4]	NA	A0A067P022/1e-140/A0A067P022_PLEOS Glycoside hydrolase family 61 protein OS=Pleurotus ostreatus PC15 GN=PLEOSDRAFT_1083326 PE=4 SV=1	PF03443/2.6E-56/Glycosyl hydrolase family 61	NA
PA_10007753	58.1733	10.6333	-2.32819	AA9	gi|646311441|gb|KDQ32582.1|/2.41966e-153/glycoside hydrolase family 61 protein [Pleurotus ostreatus PC15]	gi|630192461|ref|XM_007850817.1|/1e-125/Moniliophthora roreri MCA 2997 glycoside hydrolase family 61 protein partial mRNA	G2Q9T3/4e-40/CEL61_MYCTT Polysaccharide monooxygenase Cel61a OS=Myceliophthora thermophila (strain ATCC 42464 / BCRC 31852 / DSM 1799) GN=Cel61a PE=1 SV=1	afm:AFUA_3G03870/3e-34/endo-1,4-beta-glucanase (EC:3.2.1.4); K01179 endoglucanase [EC:3.2.1.4]	NA	A0A067P815/7e-153/A0A067P815_PLEOS Glycoside hydrolase family 61 protein OS=Pleurotus ostreatus PC15 GN=PLEOSDRAFT_1098582 PE=4 SV=1	PF03443/1.6E-46/Glycosyl hydrolase family 61	molecular_function:GO:0016787//hydrolase activity;
PA_10009399	45.92	2.43333	-3.94458	AA9	gi|646310269|gb|KDQ31412.1|/3.90364e-165/glycoside hydrolase family 61 protein [Pleurotus ostreatus PC15]	gi|597974766|ref|XM_007361736.1|/1e-121/Dichomitus squalens LYAD-421 SS1 glycoside hydrolase family 61 protein (DICSQDRAFT_166212), partial mRNA	G2Q9T3/1e-33/CEL61_MYCTT Polysaccharide monooxygenase Cel61a OS=Myceliophthora thermophila (strain ATCC 42464 / BCRC 31852 / DSM 1799) GN=Cel61a PE=1 SV=1	hir:HETIRDRAFT_58346/2e-37/GH61E; glycosyl hydrolase family 61.5; K19356 cellulase [EC:3.2.1.4]	NA	A0A067P4T8/1e-164/A0A067P4T8_PLEOS Glycoside hydrolase family 61 protein OS=Pleurotus ostreatus PC15 GN=PLEOSDRAFT_166612 PE=4 SV=1	PF03443/2.7E-62/Glycosyl hydrolase family 61	NA
PA_10009400	34.9467	2.40667	-3.71235	AA9	gi|646310268|gb|KDQ31411.1|/4.42984e-147/glycoside hydrolase family 61 protein [Pleurotus ostreatus PC15]	gi|398258455|gb|JQ290105.1|/1e-104/Heterobasidion parviporum glycoside hydrolase family 61 protein F (GH61F) mRNA, complete cds	G2Q9T3/3e-33/CEL61_MYCTT Polysaccharide monooxygenase Cel61a OS=Myceliophthora thermophila (strain ATCC 42464 / BCRC 31852 / DSM 1799) GN=Cel61a PE=1 SV=1	ncr:NCU02916/2e-24/gh61-3; glycosylhydrolase family 61-3; K19356 cellulase [EC:3.2.1.4]	NA	A0A067P6A2/1e-146/A0A067P6A2_PLEOS Glycoside hydrolase family 61 protein OS=Pleurotus ostreatus PC15 GN=PLEOSDRAFT_156073 PE=4 SV=1	PF03443/8.2E-51/Glycosyl hydrolase family 61	NA
PA_10001115	40.3833	3.45667	-3.41857	AA9	gi|646310852|gb|KDQ31994.1|/7.4451e-128/glycoside hydrolase family 61 protein, partial [Pleurotus ostreatus PC15]	gi|595785105|ref|XM_007271034.1|/1e-119/Fomitiporia mediterranea MF3/22 glycoside hydrolase family 61 protein (FOMMEDRAFT_170904), partial mRNA	A2R5N0/5e-42/EGLD_ASPNC Probable endo-beta-1,4-glucanase D OS=Aspergillus niger (strain CBS 513.88 / FGSC A1513) GN=eglD PE=3 SV=1	fme:FOMMEDRAFT_170904/8e-119/glycoside hydrolase family 61 protein; K19356 cellulase [EC:3.2.1.4]	NA	A0A067NVR6/2e-127/A0A067NVR6_PLEOS Glycoside hydrolase family 61 protein (Fragment) OS=Pleurotus ostreatus PC15 GN=PLEOSDRAFT_18797 PE=4 SV=1	PF03443/6.2E-51/Glycosyl hydrolase family 61	NA
PA_10001394	39.6867	121.68	1.74831	AA9	gi|646303250|gb|KDQ24398.1|/0/hypothetical protein PLEOSDRAFT_1090299 [Pleurotus ostreatus PC15]	gi|630212395|ref|XM_007857294.1|/1e-111/Moniliophthora roreri MCA 2997 glycoside hydrolase family 61 protein partial mRNA	Q2US83/2e-71/EGLD_ASPOR Probable endo-beta-1,4-glucanase D OS=Aspergillus oryzae (strain ATCC 42149 / RIB 40) GN=eglD PE=3 SV=1	mrr:Moror_11015/2e-111/glycoside hydrolase family 61 protein; K19356 cellulase [EC:3.2.1.4]	NA	A0A067N8R1/0.0/A0A067N8R1_PLEOS Uncharacterized protein OS=Pleurotus ostreatus PC15 GN=PLEOSDRAFT_1090299 PE=4 SV=1	PF03443/2.7E-48/Glycosyl hydrolase family 61	NA
PA_10002644	27.2433	11.0867	-1.16704	AA9	gi|646304007|gb|KDQ25154.1|/2.98878e-180/glycoside hydrolase family 61 protein [Pleurotus ostreatus PC15]	gi|636608644|ref|XM_008037266.1|/1e-115/Trametes versicolor FP-101664 SS1 cellulose-growth-specific protein mRNA	Q00023/5e-96/CEL1_AGABI Cellulose-growth-specific protein OS=Agaricus bisporus GN=cel1 PE=3 SV=1	mrr:Moror_12493/3e-43/endoglucanase ii; K19356 cellulase [EC:3.2.1.4]	NA	A0A067NBB9/9e-180/A0A067NBB9_PLEOS Glycoside hydrolase family 61 protein OS=Pleurotus ostreatus PC15 GN=PLEOSDRAFT_1077867 PE=4 SV=1	PF03443/1.1E-53/Glycosyl hydrolase family 61	NA
PA_10005156	140.107	38.3967	-1.74548	AA9	gi|646304007|gb|KDQ25154.1|/0/glycoside hydrolase family 61 protein [Pleurotus ostreatus PC15]	gi|636608644|ref|XM_008037266.1|/1e-137/Trametes versicolor FP-101664 SS1 cellulose-growth-specific protein mRNA	Q00023/2e-116/CEL1_AGABI Cellulose-growth-specific protein OS=Agaricus bisporus GN=cel1 PE=3 SV=1	mrr:Moror_12493/6e-42/endoglucanase ii; K19356 cellulase [EC:3.2.1.4]	NA	A0A067NBB9/0.0/A0A067NBB9_PLEOS Glycoside hydrolase family 61 protein OS=Pleurotus ostreatus PC15 GN=PLEOSDRAFT_1077867 PE=4 SV=1	PF03443/5.0E-55/Glycosyl hydrolase family 61	NA
PA_10006188	25.8267	3.13667	-2.92179	AA9	gi|646306182|gb|KDQ27327.1|/0/glycoside hydrolase family 61 protein, partial [Pleurotus ostreatus PC15]	gi|630179860|ref|XM_007846777.1|/1e-127/Moniliophthora roreri MCA 2997 endoglucanase ii partial mRNA	A1C4H2/8e-53/EGLD_ASPCL Probable endo-beta-1,4-glucanase D OS=Aspergillus clavatus (strain ATCC 1007 / CBS 513.65 / DSM 816 / NCTC 3887 / NRRL 1) GN=eglD PE=3 SV=1	mrr:Moror_12493/2e-127/endoglucanase ii; K19356 cellulase [EC:3.2.1.4]	NA	A0A067NTB5/0.0/A0A067NTB5_PLEOS Glycoside hydrolase family 61 protein (Fragment) OS=Pleurotus ostreatus PC15 GN=PLEOSDRAFT_1029749 PE=4 SV=1	PF00734/2.3E-12/Fungal cellulose binding domain	NA
PA_10007540	15.1233	0.001	-7.28087	AA9	gi|646307537|gb|KDQ28681.1|/5.85964e-165/glycoside hydrolase family 61 protein [Pleurotus ostreatus PC15]	gi|630179860|ref|XM_007846777.1|/1e-132/Moniliophthora roreri MCA 2997 endoglucanase ii partial mRNA	Q4WBU0/6e-47/EGLD_ASPFU Probable endo-beta-1,4-glucanase D OS=Neosartorya fumigata (strain ATCC MYA-4609 / Af293 / CBS 101355 / FGSC A1100) GN=eglD PE=3 SV=1	mrr:Moror_12493/2e-131/endoglucanase ii; K19356 cellulase [EC:3.2.1.4]	NA	A0A067NYI6/2e-164/A0A067NYI6_PLEOS Glycoside hydrolase family 61 protein OS=Pleurotus ostreatus PC15 GN=PLEOSDRAFT_1102722 PE=4 SV=1	PF03443/1.4E-63/Glycosyl hydrolase family 61	NA
PA_10008442	94.0133	8.85	-3.32223	AA9	gi|646312212|gb|KDQ33353.1|/2.96544e-160/glycoside hydrolase family 61 protein [Pleurotus ostreatus PC15]	gi|630179860|ref|XM_007846777.1|/1e-150/Moniliophthora roreri MCA 2997 endoglucanase ii partial mRNA	Q4WBU0/2e-56/EGLD_ASPFU Probable endo-beta-1,4-glucanase D OS=Neosartorya fumigata (strain ATCC MYA-4609 / Af293 / CBS 101355 / FGSC A1100) GN=eglD PE=3 SV=1	mrr:Moror_12493/1e-150/endoglucanase ii; K19356 cellulase [EC:3.2.1.4]	NA	A0A067NZ88/9e-160/A0A067NZ88_PLEOS Glycoside hydrolase family 61 protein OS=Pleurotus ostreatus PC15 GN=PLEOSDRAFT_152986 PE=4 SV=1	PF03443/5.2E-63/Glycosyl hydrolase family 61	biological_process:GO:0005975//carbohydrate metabolic process;cellular_component:GO:0005576//extracellular region;molecular_function:GO:0030248//cellulose binding;GO:0004553//hydrolase activity, hydrolyzing O-glycosyl compounds;
PA_10004068	21.9133	0.41	-5.78872	AA12	gi|646301235|gb|KDQ22386.1|/0/hypothetical protein PLEOSDRAFT_1114567 [Pleurotus ostreatus PC15]	gi|630189448|ref|XM_007849854.1|/1e-161/Moniliophthora roreri MCA 2997 nhl repeat-containing protein partial mRNA	NA	NA	all4539/1e-16/---	A0A067NF67/0.0/A0A067NF67_PLEOS Uncharacterized protein OS=Pleurotus ostreatus PC15 GN=PLEOSDRAFT_1114567 PE=4 SV=1	NA	NA
PA_10007953	70.91	9.75333	-2.73082	CBM1	gi|646311675|gb|KDQ32816.1|/7.49339e-140/carbohydrate-binding module family 1 protein [Pleurotus ostreatus PC15]	gi|630184935|ref|XM_007848398.1|/1e-104/Moniliophthora roreri MCA 2997 carbohydrate-binding module family 1 protein partial mRNA	Q9HEZ1/8e-11/XYNA_PHACH Endo-1,4-beta-xylanase A OS=Phanerochaete chrysosporium GN=xynA PE=1 SV=1	mrr:Moror_3211/1e-13/glycoside hydrolase family 5 protein; K19355 mannan endo-1,4-beta-mannosidase [EC:3.2.1.78]	NA	A0A067PAD1/2e-139/A0A067PAD1_PLEOS Carbohydrate-binding module family 1 protein OS=Pleurotus ostreatus PC15 GN=PLEOSDRAFT_1080297 PE=4 SV=1	PF00734/5.7E-12/Fungal cellulose binding domain	NA
PA_10000141	794.477	109.283	-2.75167	CBM13	gi|646301765|gb|KDQ22916.1|/1.67334e-94/carbohydrate-binding module family 13 protein [Pleurotus ostreatus PC15]	gi|618806004|ref|XM_007305700.1|/3e-47/Stereum hirsutum FP-91666 SS1 ricin B-like lectin (STEHIDRAFT_60520), partial mRNA	NA	NA	NA	A0A067NGP7/5e-94/A0A067NGP7_PLEOS Carbohydrate-binding module family 13 protein OS=Pleurotus ostreatus PC15 GN=PLEOSDRAFT_1080027 PE=4 SV=1	PF14200/6.1E-14/Ricin-type beta-trefoil lectin domain-like	NA
PA_10000576	466.563	23.58	-4.1954	CBM13	gi|646301512|gb|KDQ22663.1|/0/hypothetical protein PLEOSDRAFT_1050656, partial [Pleurotus ostreatus PC15]	gi|630199160|ref|XM_007852979.1|/1e-149/Moniliophthora roreri MCA 2997 macrofage activating glycoprotein partial mRNA	NA	NA	NA	A0A067N3R5/0.0/A0A067N3R5_PLEOS Uncharacterized protein (Fragment) OS=Pleurotus ostreatus PC15 GN=PLEOSDRAFT_1050656 PE=4 SV=1	NA	NA
PA_10001078	60.4067	325.37	2.51986	CBM13	gi|646310818|gb|KDQ31960.1|/5.92302e-57/carbohydrate-binding module family 13 protein [Pleurotus ostreatus PC15]	gi|597932205|ref|XM_007320385.1|/2e-20/Serpula lacrymans var. lacrymans S7.9 carbohydrate-binding module family 13 protein (SERLADRAFT_409609), partial mRNA	NA	NA	NA	A0A067NYA5/2e-56/A0A067NYA5_PLEOS Carbohydrate-binding module family 13 protein OS=Pleurotus ostreatus PC15 GN=PLEOSDRAFT_1034502 PE=4 SV=1	PF14200/2.7E-10/Ricin-type beta-trefoil lectin domain-like	NA
PA_10005155	212.057	468.817	1.27433	CBM13	gi|646304005|gb|KDQ25152.1|/0/hypothetical protein PLEOSDRAFT_1089988 [Pleurotus ostreatus PC15]	gi|630199160|ref|XM_007852979.1|/1e-158/Moniliophthora roreri MCA 2997 macrofage activating glycoprotein partial mRNA	NA	NA	NA	A0A067NM22/0.0/A0A067NM22_PLEOS Uncharacterized protein OS=Pleurotus ostreatus PC15 GN=PLEOSDRAFT_1089988 PE=4 SV=1	NA	cellular_component:GO:0016020//membrane;
PA_10008001	22.81	3.01	-2.7814	CBM13	gi|749884797|gb|KIJ54205.1|/2.07887e-43/carbohydrate-binding module family 13 protein [Sphaerobolus stellatus SS14]	gi|299742666|ref|XM_001832596.2|/2e-35/Coprinopsis cinerea okayama7#130 G-X-X-X-Q-X-W domain-containing protein, mRNA	NA	NA	NA	A0A067NNB6/6e-41/A0A067NNB6_PLEOS Carbohydrate-binding module family 13 protein (Fragment) OS=Pleurotus ostreatus PC15 GN=PLEOSDRAFT_10796 PE=4 SV=1	PF00652/3.7E-19/Ricin-type beta-trefoil lectin domain	NA
PA_10009253	23.6733	62.64	1.51225	CBM13	gi|646310418|gb|KDQ31561.1|/9.81257e-106/carbohydrate-binding module family 13 protein [Pleurotus ostreatus PC15]	gi|299742666|ref|XM_001832596.2|/4e-50/Coprinopsis cinerea okayama7#130 G-X-X-X-Q-X-W domain-containing protein, mRNA	NA	NA	NA	A0A067P6M4/3e-105/A0A067P6M4_PLEOS Carbohydrate-binding module family 13 protein OS=Pleurotus ostreatus PC15 GN=PLEOSDRAFT_1054597 PE=4 SV=1	PF00652/1.5E-20/Ricin-type beta-trefoil lectin domain	NA
PA_10009265	339.34	1136.35	1.86026	CBM13	gi|646310401|gb|KDQ31544.1|/5.65908e-102/carbohydrate-binding module family 13 protein [Pleurotus ostreatus PC15]	gi|299742666|ref|XM_001832596.2|/2e-53/Coprinopsis cinerea okayama7#130 G-X-X-X-Q-X-W domain-containing protein, mRNA	NA	NA	NA	A0A067NUF0/2e-101/A0A067NUF0_PLEOS Carbohydrate-binding module family 13 protein OS=Pleurotus ostreatus PC15 GN=PLEOSDRAFT_1102507 PE=4 SV=1	PF00652/1.3E-21/Ricin-type beta-trefoil lectin domain	NA
PA_10009266	113.997	444.417	2.0815	CBM13	gi|646310402|gb|KDQ31545.1|/8.30663e-129/carbohydrate-binding module family 13 protein [Pleurotus ostreatus PC15]	gi|299742666|ref|XM_001832596.2|/5e-51/Coprinopsis cinerea okayama7#130 G-X-X-X-Q-X-W domain-containing protein, mRNA	NA	NA	NA	A0A067NX20/3e-128/A0A067NX20_PLEOS Carbohydrate-binding module family 13 protein OS=Pleurotus ostreatus PC15 GN=PLEOSDRAFT_1111850 PE=4 SV=1	PF00652/5.7E-16/Ricin-type beta-trefoil lectin domain	NA
PA_10010585	8.52	2.58667	-1.59804	CBM20	gi|646309024|gb|KDQ30167.1|/0/glycoside hydrolase family 13 protein [Pleurotus ostreatus PC15]	gi|636617954|ref|XM_008041921.1|/1e-100/Trametes versicolor FP-101664 SS1 glycoside hydrolase family 13 protein mRNA	P0C1B3/1e-78/AMYA1_ASPOR Alpha-amylase A type-1/2 OS=Aspergillus oryzae (strain ATCC 42149 / RIB 40) GN=amy1 PE=1 SV=1	shs:STEHIDRAFT_124370/8e-94/glycoside hydrolase family 13 protein; K01176 alpha-amylase [EC:3.2.1.1]	SPAC27E2.01/3e-69/---	A0A067P186/0.0/A0A067P186_PLEOS Glycoside hydrolase family 13 protein OS=Pleurotus ostreatus PC15 GN=PLEOSDRAFT_1074626 PE=4 SV=1	PF00128/1.5E-41/Alpha amylase, catalytic domain	NA
PA_10010692	54.0333	10.11	-2.29299	CBM20	gi|646308860|gb|KDQ30003.1|/0/glycoside hydrolase family 13 protein [Pleurotus ostreatus PC15]	gi|630186739|ref|XM_007848989.1|/0.0/Moniliophthora roreri MCA 2997 alpha-amylase partial mRNA	P56634/2e-103/AMY_TENMO Alpha-amylase OS=Tenebrio molitor PE=1 SV=1	NA	CAP0168/2e-17/---	A0A067NPJ8/0.0/A0A067NPJ8_PLEOS Alpha-amylase OS=Pleurotus ostreatus PC15 GN=PLEOSDRAFT_1095839 PE=3 SV=1	PF02806/5.0E-13/Alpha amylase, C-terminal all-beta domain	biological_process:GO:0005975//carbohydrate metabolic process;molecular_function:GO:0004556//alpha-amylase activity;GO:2001070//starch binding;GO:0043169//cation binding;
PA_10001872	245.813	34.86	-2.68501	CBM67	gi|646302099|gb|KDQ23249.1|/0/hypothetical protein PLEOSDRAFT_1108884 [Pleurotus ostreatus PC15]	gi|315190038|gb|HQ606464.1|/0.0/Pleurotus ostreatus strain 739 lectin mRNA, complete cds	NA	NA	NA	A0A067N5Y2/0.0/A0A067N5Y2_PLEOS Uncharacterized protein OS=Pleurotus ostreatus PC15 GN=PLEOSDRAFT_1108884 PE=4 SV=1	NA	NA
PA_10009182	112.55	264.913	1.45254	CBM67	gi|646313093|gb|KDQ34234.1|/0/hypothetical protein PLEOSDRAFT_163900 [Pleurotus ostreatus PC15]	gi|315190038|gb|HQ606464.1|/1e-157/Pleurotus ostreatus strain 739 lectin mRNA, complete cds	NA	NA	NA	A0A067P241/0.0/A0A067P241_PLEOS Uncharacterized protein OS=Pleurotus ostreatus PC15 GN=PLEOSDRAFT_163900 PE=4 SV=1	NA	NA
PA_10001650	177.52	3.80333	-5.46325	CE16	gi|646301901|gb|KDQ23051.1|/0/carbohydrate esterase family 16 protein [Pleurotus ostreatus PC15]	gi|630196197|ref|XM_007852024.1|/1e-156/Moniliophthora roreri MCA 2997 gdsl lipase acylhydrolase family protein partial mRNA	NA	NA	NA	A0A067NH03/0.0/A0A067NH03_PLEOS Carbohydrate esterase family 16 protein OS=Pleurotus ostreatus PC15 GN=PLEOSDRAFT_1108685 PE=4 SV=1	PF00657/1.2E-12/GDSL-like Lipase/Acylhydrolase	molecular_function:GO:0016788//hydrolase activity, acting on ester bonds;
PA_10003282	51.07	7.62333	-2.60853	CE16	gi|646305319|gb|KDQ26465.1|/1.21714e-134/carbohydrate esterase family 16 protein [Pleurotus ostreatus PC15]	gi|630197139|ref|XM_007852328.1|/1e-101/Moniliophthora roreri MCA 2997 carbohydrate esterase family 16 protein partial mRNA	NA	NA	NA	A0A067NHL7/4e-134/A0A067NHL7_PLEOS Carbohydrate esterase family 16 protein OS=Pleurotus ostreatus PC15 GN=PLEOSDRAFT_1077420 PE=4 SV=1	NA	NA
PA_10007660	43.93	8.32	-2.26809	GH1	gi|646311345|gb|KDQ32486.1|/0/glycoside hydrolase family 1 protein [Pleurotus ostreatus PC15]	gi|630189442|ref|XM_007849852.1|/0.0/Moniliophthora roreri MCA 2997 glycoside hydrolase family 1 protein partial mRNA	Q25BW4/0.0/BGL1B_PHACH Beta-glucosidase 1B OS=Phanerochaete chrysosporium GN=BGL1B PE=1 SV=1	mrr:Moror_16039/0.0/glycoside hydrolase family 1 protein; K01188 beta-glucosidase [EC:3.2.1.21]	BH1923/1e-90/---	A0A067P9B5/0.0/A0A067P9B5_PLEOS Glycoside hydrolase family 1 protein OS=Pleurotus ostreatus PC15 GN=PLEOSDRAFT_1098487 PE=3 SV=1	PF00232/1.2E-89/Glycosyl hydrolase family 1	biological_process:GO:0005975//carbohydrate metabolic process;molecular_function:GO:0004553//hydrolase activity, hydrolyzing O-glycosyl compounds;
PA_10001379	26.3367	6.20667	-1.91173	GH10	gi|751670942|gb|KIM21207.1|/0/glycoside hydrolase family 10 protein [Serendipita vermifera MAFF 305830]	gi|339219001|gb|HQ730916.1|/1e-148/Gloeophyllum trabeum beta-1,4-endoxylanase mRNA, complete cds	Q9HEZ1/3e-144/XYNA_PHACH Endo-1,4-beta-xylanase A OS=Phanerochaete chrysosporium GN=xynA PE=1 SV=1	psq:PUNSTDRAFT_52135/4e-149/endo-1,4-beta-xylanase A precursor; K01181 endo-1,4-beta-xylanase [EC:3.2.1.8]	TM0070/3e-64/---	A0A0C2WUY2/0.0/A0A0C2WUY2_9HOMO Beta-xylanase OS=Serendipita vermifera MAFF 305830 GN=M408DRAFT_110734 PE=3 SV=1	PF00734/1.1E-10/Fungal cellulose binding domain	NA
PA_10008940	41.2533	16.69	-1.17427	GH10	gi|646312789|gb|KDQ33930.1|/0/glycoside hydrolase family 10 protein [Pleurotus ostreatus PC15]	gi|302684504|ref|XM_003031887.1|/1e-170/Schizophyllum commune H4-8 glycoside hydrolase family 10 and carbohydrate-binding module family 1 protein, mRNA	Q96VB6/1e-126/XYNF3_ASPOR Endo-1,4-beta-xylanase F3 OS=Aspergillus oryzae (strain ATCC 42149 / RIB 40) GN=xynF3 PE=1 SV=1	scm:SCHCODRAFT_15936/7e-170/glycoside hydrolase family 10 and carbohydrate-binding module family 1 protein; K01181 endo-1,4-beta-xylanase [EC:3.2.1.8]	TM0070/2e-47/---	A0A067P3W7/0.0/A0A067P3W7_PLEOS Beta-xylanase OS=Pleurotus ostreatus PC15 GN=PLEOSDRAFT_1091692 PE=3 SV=1	PF00331/8.8E-89/Glycosyl hydrolase family 10	NA
PA_10007098	41.4333	17.2567	-1.13338	GH105	gi|646308005|gb|KDQ29149.1|/0/glycoside hydrolase family 105 protein [Pleurotus ostreatus PC15]	gi|695541190|ref|XM_009544919.1|/0.0/Heterobasidion irregulare TC 32-1 glycoside hydrolase family 105 protein partial mRNA	NA	psq:PUNSTDRAFT_100237/0.0/glycoside hydrolase family 105 protein; K15532 unsaturated rhamnogalacturonyl hydrolase [EC:3.2.1.172]	STM1911/1e-145/---	A0A067NMI1/0.0/A0A067NMI1_PLEOS Glycoside hydrolase family 105 protein OS=Pleurotus ostreatus PC15 GN=PLEOSDRAFT_1038184 PE=4 SV=1	PF07470/9.2E-81/Glycosyl Hydrolase Family 88	molecular_function:GO:0016787//hydrolase activity;
PA_10001989	0.926667	4.93667	2.59556	GH11	gi|164562254|gb|ABY61039.1|/3.67317e-127/xylanase [Pleurotus ostreatus]	gi|164562253|gb|EU359682.1|/1e-102/Pleurotus ostreatus strain HB188 xylanase gene, complete cds	A6YAP7/1e-74/XYN1_LEUGO Endo-1,4-beta-xylanase 1 OS=Leucoagaricus gongylophorus GN=Xyn1 PE=1 SV=1	mrr:Moror_3304/7e-80/xylanase a; K01181 endo-1,4-beta-xylanase [EC:3.2.1.8]	NA	B0FX60/1e-126/B0FX60_PLEOS Endo-1,4-beta-xylanase OS=Pleurotus ostreatus PE=3 SV=1	PF00457/8.2E-44/Glycosyl hydrolases family 11	NA
PA_10001991	186.34	37.9133	-2.16818	GH11	gi|646302232|gb|KDQ23382.1|/2.05685e-178/glycoside hydrolase family 11 protein, partial [Pleurotus ostreatus PC15]	gi|164562253|gb|EU359682.1|/1e-124/Pleurotus ostreatus strain HB188 xylanase gene, complete cds	A6YAP7/4e-111/XYN1_LEUGO Endo-1,4-beta-xylanase 1 OS=Leucoagaricus gongylophorus GN=Xyn1 PE=1 SV=1	mrr:Moror_3304/7e-121/xylanase a; K01181 endo-1,4-beta-xylanase [EC:3.2.1.8]	NA	A0A067NH24/6e-178/A0A067NH24_PLEOS Endo-1,4-beta-xylanase (Fragment) OS=Pleurotus ostreatus PC15 GN=PLEOSDRAFT_1098194 PE=3 SV=1	PF00734/7.6E-14/Fungal cellulose binding domain	biological_process:GO:0045493//xylan catabolic process;molecular_function:GO:0031176//endo-1,4-beta-xylanase activity;
PA_10001458	23.1567	1.17	-4.16104	GH128	gi|646303313|gb|KDQ24461.1|/0/hypothetical protein PLEOSDRAFT_1046423 [Pleurotus ostreatus PC15]	gi|820654388|emb|LN483124.1|/4e-87/Xanthophyllomyces dendrorhous genome assembly Xden1, scaffold Scaffold_33	Q09788/2e-09/ASL1_SCHPO Alkali-sensitive linkage protein 1 OS=Schizosaccharomyces pombe (strain 972 / ATCC 24843) GN=asl1 PE=1 SV=1	NA	NA	A0A067NLI1/0.0/A0A067NLI1_PLEOS Uncharacterized protein OS=Pleurotus ostreatus PC15 GN=PLEOSDRAFT_1046423 PE=4 SV=1	PF11790/4.9E-49/Glycosyl hydrolase catalytic core	NA
PA_10004520	108.073	35.5	-1.47927	GH131	gi|646304438|gb|KDQ25585.1|/3.22785e-179/hypothetical protein PLEOSDRAFT_1078081 [Pleurotus ostreatus PC15]	gi|630196240|ref|XM_007852038.1|/1e-156/Moniliophthora roreri MCA 2997 carbohydrate-binding module family 1 protein partial mRNA	O14405/1e-09/GUN4_HYPJE Endoglucanase-4 OS=Hypocrea jecorina GN=cel61a PE=1 SV=1	scm:SCHCODRAFT_236920/2e-10/carbohydrate esterase family 1 and carbohydrate-binding module family 1 protein; K05972 acetylxylan esterase [EC:3.1.1.72]	NA	A0A067NF20/1e-178/A0A067NF20_PLEOS Uncharacterized protein OS=Pleurotus ostreatus PC15 GN=PLEOSDRAFT_1078081 PE=4 SV=1	PF00734/5.9E-11/Fungal cellulose binding domain	NA
PA_10005590	111.687	39.2067	-1.28564	GH15	gi|646306889|gb|KDQ28034.1|/0/glycoside hydrolase family 15 protein [Pleurotus ostreatus PC15]	gi|595779805|ref|XM_007268384.1|/0.0/Fomitiporia mediterranea MF3/22 glucoamylase (FOMMEDRAFT_89129), partial mRNA	D8Q9M3/0.0/AMYG_SCHCM Glucoamylase ARB_02327-1 OS=Schizophyllum commune (strain H4-8 / FGSC 9210) GN=SCHCODRAFT_57589 PE=1 SV=1	fme:FOMMEDRAFT_89129/0.0/glucoamylase; K01178 glucoamylase [EC:3.2.1.3]	SPBC14C8.05c/5e-76/---	NA	PF00723/2.1E-21/Glycosyl hydrolases family 15	biological_process:GO:0005976//polysaccharide metabolic process;molecular_function:GO:0030246//carbohydrate binding;GO:0016798//hydrolase activity, acting on glycosyl bonds;
PA_10000556	108.047	406.097	1.96409	GH16	gi|646301475|gb|KDQ22626.1|/0/glycoside hydrolase family 16 protein [Pleurotus ostreatus PC15]	gi|170104259|ref|XM_001883309.1|/0.0/Laccaria bicolor S238N-H82 GH16 beta-1,3-glucan recognition protein partial mRNA	Q8N0N3/2e-66/BGBP_PENMO Beta-1,3-glucan-binding protein OS=Penaeus monodon PE=2 SV=1	NA	TM0024/3e-18/---	A0A067NFR9/0.0/A0A067NFR9_PLEOS Glycoside hydrolase family 16 protein OS=Pleurotus ostreatus PC15 GN=PLEOSDRAFT_1072937 PE=4 SV=1	PF00722/9.8E-17/Glycosyl hydrolases family 16	NA
PA_10003184	50.9667	124.343	1.41761	GH16	gi|646305447|gb|KDQ26593.1|/0/glycoside hydrolase family 16 protein [Pleurotus ostreatus PC15]	gi|170087845|ref|XM_001875111.1|/1e-146/Laccaria bicolor S238N-H82 glycoside hydrolase family 16 protein partial mRNA	Q9USW3/7e-77/YHZ7_SCHPO Probable glycosidase C21B10.07 OS=Schizosaccharomyces pombe (strain 972 / ATCC 24843) GN=SPBC21B10.07 PE=3 SV=1	bor:COCMIDRAFT_40123/2e-40/glycoside hydrolase family 16 protein; K00767 nicotinate-nucleotide pyrophosphorylase (carboxylating) [EC:2.4.2.19]	NA	A0A067NEW7/0.0/A0A067NEW7_PLEOS Glycoside hydrolase family 16 protein OS=Pleurotus ostreatus PC15 GN=PLEOSDRAFT_1077485 PE=4 SV=1	PF00722/1.1E-4/Glycosyl hydrolases family 16	molecular_function:GO:0016787//hydrolase activity;
PA_10005804	29.75	12.8067	-1.08941	GH16	gi|646306659|gb|KDQ27804.1|/1.82992e-134/glycoside hydrolase family 16 protein [Pleurotus ostreatus PC15]	gi|595776379|ref|XM_007266671.1|/8e-63/Fomitiporia mediterranea MF3/22 2 beta-glucans in both donor and acceptor sites of Gh16 Laminarinase 16a (FOMMEDRAFT_123180), mRNA	Q9USW3/3e-34/YHZ7_SCHPO Probable glycosidase C21B10.07 OS=Schizosaccharomyces pombe (strain 972 / ATCC 24843) GN=SPBC21B10.07 PE=3 SV=1	bze:COCCADRAFT_9409/1e-18/glycoside hydrolase family 16 protein; K00767 nicotinate-nucleotide pyrophosphorylase (carboxylating) [EC:2.4.2.19]	NA	A0A067NIY5/6e-134/A0A067NIY5_PLEOS Glycoside hydrolase family 16 protein OS=Pleurotus ostreatus PC15 GN=PLEOSDRAFT_28924 PE=4 SV=1	NA	NA
PA_10006162	205.53	16.7733	-3.48347	GH16	gi|568464692|ref|XP_006463991.1|/5.34027e-133/hypothetical protein AGABI2DRAFT_194618 [Agaricus bisporus var. bisporus H97] &gt;gi|426194739|gb|EKV44670.1| hypothetical protein AGABI2DRAFT_194618 [Agaricus bisporus var. bisporus H97]	gi|630178117|ref|XM_007846209.1|/1e-108/Moniliophthora roreri MCA 2997 glycoside hydrolase family 16 protein partial mRNA	F7J1C8/2e-97/E3GAL_FLAVE Galactan endo-beta-1,3-galactanase OS=Flammulina velutipes GN=EN3GAL PE=1 SV=1	NA	NA	K9HZR2/2e-132/K9HZR2_AGABB Uncharacterized protein OS=Agaricus bisporus var. bisporus (strain H97 / ATCC MYA-4626 / FGSC 10389) GN=AGABI2DRAFT_194618 PE=4 SV=1	NA	biological_process:GO:0005975//carbohydrate metabolic process;molecular_function:GO:0004553//hydrolase activity, hydrolyzing O-glycosyl compounds;
PA_10006436	240.527	19.1467	-3.51991	GH16	gi|646308723|gb|KDQ29867.1|/0/glycoside hydrolase family 16 protein [Pleurotus ostreatus PC15]	gi|630358712|ref|XM_007870440.1|/1e-143/Gloeophyllum trabeum ATCC 11539 endo-beta-glucanase partial mRNA	Q9USW3/4e-67/YHZ7_SCHPO Probable glycosidase C21B10.07 OS=Schizosaccharomyces pombe (strain 972 / ATCC 24843) GN=SPBC21B10.07 PE=3 SV=1	bor:COCMIDRAFT_40123/9e-33/glycoside hydrolase family 16 protein; K00767 nicotinate-nucleotide pyrophosphorylase (carboxylating) [EC:2.4.2.19]	NA	A0A067P0F8/0.0/A0A067P0F8_PLEOS Glycoside hydrolase family 16 protein OS=Pleurotus ostreatus PC15 GN=PLEOSDRAFT_1076482 PE=4 SV=1	PF00722/3.5E-6/Glycosyl hydrolases family 16	molecular_function:GO:0016787//hydrolase activity;
PA_10010330	184.673	344.503	1.0299	GH16	gi|646309267|gb|KDQ30410.1|/0/glycoside hydrolase family 16 protein, partial [Pleurotus ostreatus PC15]	gi|169844528|ref|XM_001828933.1|/1e-162/Coprinopsis cinerea okayama7#130 ### endo-1,3(4)-beta-glucanase, mRNA	Q9USW3/9e-80/YHZ7_SCHPO Probable glycosidase C21B10.07 OS=Schizosaccharomyces pombe (strain 972 / ATCC 24843) GN=SPBC21B10.07 PE=3 SV=1	bor:COCMIDRAFT_40123/2e-62/glycoside hydrolase family 16 protein; K00767 nicotinate-nucleotide pyrophosphorylase (carboxylating) [EC:2.4.2.19]	NA	A0A067NTT5/0.0/A0A067NTT5_PLEOS Glycoside hydrolase family 16 protein (Fragment) OS=Pleurotus ostreatus PC15 GN=PLEOSDRAFT_1053615 PE=4 SV=1	PF00722/1.3E-5/Glycosyl hydrolases family 16	NA
PA_10005587	86.2567	28.8133	-1.45585	GH17	gi|646306892|gb|KDQ28037.1|/0/glycoside hydrolase family 17 protein [Pleurotus ostreatus PC15]	gi|630175813|ref|XM_007845462.1|/1e-173/Moniliophthora roreri MCA 2997 b-(1-6) glucan synthase partial mRNA	NA	NA	NA	NA	NA	NA
PA_10002409	7.27	1.74333	-2.01078	GH18	gi|646302716|gb|KDQ23865.1|/0/glycoside hydrolase family 18 protein [Pleurotus ostreatus PC15]	gi|169861537|ref|XM_001837351.1|/1e-173/Coprinopsis cinerea okayama7#130 t## endochitinase, mRNA	Q91XA9/2e-33/CHIA_MOUSE Acidic mammalian chitinase OS=Mus musculus GN=Chia PE=1 SV=2	mrr:Moror_13879/4e-165/glycoside hydrolase family 18 protein; K01183 chitinase [EC:3.2.1.14]	BH0916_1/2e-38/---	A0A067NAB3/0.0/A0A067NAB3_PLEOS Glycoside hydrolase family 18 protein OS=Pleurotus ostreatus PC15 GN=PLEOSDRAFT_1067912 PE=3 SV=1	PF00704/3.7E-57/Glycosyl hydrolases family 18	biological_process:GO:0071704//organic substance metabolic process;molecular_function:GO:0004553//hydrolase activity, hydrolyzing O-glycosyl compounds;
PA_10005618	2.16	0.001	-5.50418	GH18	gi|646306858|gb|KDQ28003.1|/0/glycoside hydrolase family 18 protein [Pleurotus ostreatus PC15]	gi|630363628|ref|XM_007872898.1|/1e-124/Gloeophyllum trabeum ATCC 11539 glycoside hydrolase family 18 protein partial mRNA	P09805/1e-15/KTXA_KLULA Killer toxin subunits alpha/beta OS=Kluyveromyces lactis (strain ATCC 8585 / CBS 2359 / DSM 70799 / NBRC 1267 / NRRL Y-1140 / WM37) PE=1 SV=1	gtr:GLOTRDRAFT_82316/6e-124/glycoside hydrolase family 18 protein; K01183 chitinase [EC:3.2.1.14]	BH0916_1/3e-13/---	NA	PF00704/9.7E-32/Glycosyl hydrolases family 18	molecular_function:GO:0016787//hydrolase activity;
PA_10006229	44.23	104.947	1.37931	GH20	gi|646306205|gb|KDQ27350.1|/0/glycoside hydrolase family 20 protein [Pleurotus ostreatus PC15]	gi|597903295|ref|XM_007298885.1|/0.0/Stereum hirsutum FP-91666 SS1 glycoside hydrolase (STEHIDRAFT_164828), partial mRNA	P43077/9e-12/HEX1_CANAX Beta-hexosaminidase OS=Candida albicans GN=HEX1 PE=1 SV=1	shs:STEHIDRAFT_164828/0.0/glycoside hydrolase; K12373 hexosaminidase [EC:3.2.1.52]	VC0613/9e-16/---	A0A067NK07/0.0/A0A067NK07_PLEOS Glycoside hydrolase family 20 protein OS=Pleurotus ostreatus PC15 GN=PLEOSDRAFT_1064686 PE=4 SV=1	PF02838/2.2E-13/Glycosyl hydrolase family 20, domain 2	NA
PA_10001395	697.05	8.67333	-6.20473	GH24	gi|646303248|gb|KDQ24396.1|/1.842e-124/glycoside hydrolase family 24 protein [Pleurotus ostreatus PC15]	gi|170110099|ref|XM_001886221.1|/2e-75/Laccaria bicolor S238N-H82 glycoside hydrolase family 24 protein partial mRNA	NA	lbc:LACBIDRAFT_307590/3e-75/glycoside hydrolase family 24 protein; K01185 lysozyme [EC:3.2.1.17]	RSc0883/1e-16/---	A0A067NLC3/6e-124/A0A067NLC3_PLEOS Glycoside hydrolase family 24 protein OS=Pleurotus ostreatus PC15 GN=PLEOSDRAFT_1085602 PE=4 SV=1	PF00959/1.5E-13/Phage lysozyme	NA
PA_10001396	34.6667	9.08333	-1.80632	GH24	gi|646303247|gb|KDQ24395.1|/5.69146e-170/glycoside hydrolase family 24 protein [Pleurotus ostreatus PC15]	gi|170112705|ref|XM_001887519.1|/1e-113/Laccaria bicolor S238N-H82 glycoside hydrolase family 24 protein partial mRNA	D4ATA2/1e-29/A7466_ARTBC Uncharacterized secreted protein ARB_07466 OS=Arthroderma benhamiae (strain ATCC MYA-4681 / CBS 112371) GN=ARB_07466 PE=1 SV=1	lbc:LACBIDRAFT_239749/1e-112/glycoside hydrolase family 24 protein; K01185 lysozyme [EC:3.2.1.17]	STM1028/6e-21/---	A0A067NBT7/2e-169/A0A067NBT7_PLEOS Glycoside hydrolase family 24 protein OS=Pleurotus ostreatus PC15 GN=PLEOSDRAFT_1046899 PE=4 SV=1	PF00959/2.8E-15/Phage lysozyme	biological_process:GO:0016998//cell wall macromolecule catabolic process;GO:0009253//peptidoglycan catabolic process;molecular_function:GO:0003796//lysozyme activity;
PA_10006067	7.55667	1.22667	-2.81058	GH24	gi|646306361|gb|KDQ27506.1|/3.87017e-152/glycoside hydrolase family 24 protein [Pleurotus ostreatus PC15]	gi|170112705|ref|XM_001887519.1|/1e-107/Laccaria bicolor S238N-H82 glycoside hydrolase family 24 protein partial mRNA	D4ATA2/5e-33/A7466_ARTBC Uncharacterized secreted protein ARB_07466 OS=Arthroderma benhamiae (strain ATCC MYA-4681 / CBS 112371) GN=ARB_07466 PE=1 SV=1	lbc:LACBIDRAFT_239749/7e-107/glycoside hydrolase family 24 protein; K01185 lysozyme [EC:3.2.1.17]	STM1028/3e-18/---	A0A067NV59/1e-151/A0A067NV59_PLEOS Glycoside hydrolase family 24 protein OS=Pleurotus ostreatus PC15 GN=PLEOSDRAFT_1064841 PE=4 SV=1	PF00959/2.2E-12/Phage lysozyme	biological_process:GO:0043170//macromolecule metabolic process;GO:0009056//catabolic process;molecular_function:GO:0016787//hydrolase activity;
PA_10000427	590.563	3969.61	2.51796	GH25	gi|646310971|gb|KDQ32113.1|/6.17945e-141/glycoside hydrolase family 25 protein [Pleurotus ostreatus PC15]	gi|630193351|ref|XM_007851104.1|/1e-125/Moniliophthora roreri MCA 2997 secreted hydrolase partial mRNA	P00721/1e-73/LYS_CHASP N,O-diacetylmuramidase OS=Chalaropsis sp. PE=1 SV=1	NA	BMEI0562/1e-23/---	A0A067NVL2/2e-140/A0A067NVL2_PLEOS Lysozyme OS=Pleurotus ostreatus PC15 GN=PLEOSDRAFT_1091959 PE=3 SV=1	PF01183/2.1E-46/Glycosyl hydrolases family 25	biological_process:GO:0016998//cell wall macromolecule catabolic process;GO:0009253//peptidoglycan catabolic process;GO:0005975//carbohydrate metabolic process;molecular_function:GO:0003796//lysozyme activity;
PA_10002718	12.3667	1.53	-2.8622	GH27	gi|646305968|gb|KDQ27114.1|/0/glycoside hydrolase family 27 protein [Pleurotus ostreatus PC15]	gi|636607010|ref|XM_008036449.1|/1e-159/Trametes versicolor FP-101664 SS1 glycoside hydrolase partial mRNA	A1D0A3/8e-62/AGALB_NEOFI Probable alpha-galactosidase B OS=Neosartorya fischeri (strain ATCC 1020 / DSM 3700 / FGSC A1164 / NRRL 181) GN=aglB PE=3 SV=1	pco:PHACADRAFT_210357/7e-153/glycoside hydrolase family 27 protein; K07407 alpha-galactosidase [EC:3.2.1.22]	NA	A0A067NGW7/0.0/A0A067NGW7_PLEOS Alpha-galactosidase OS=Pleurotus ostreatus PC15 GN=PLEOSDRAFT_1043529 PE=3 SV=1	PF16499/3.0E-36/Alpha galactosidase A	NA
PA_10002738	55.4467	109.08	1.10235	GH27	gi|646305930|gb|KDQ27076.1|/7.75903e-177/glycoside hydrolase family 27 protein [Pleurotus ostreatus PC15]	gi|636607010|ref|XM_008036449.1|/1e-137/Trametes versicolor FP-101664 SS1 glycoside hydrolase partial mRNA	Q9FT97/3e-49/AGAL1_ARATH Alpha-galactosidase 1 OS=Arabidopsis thaliana GN=AGAL1 PE=2 SV=1	dsq:DICSQDRAFT_79806/1e-129/glycoside hydrolase; K07407 alpha-galactosidase [EC:3.2.1.22]	NA	A0A067NTX6/2e-176/A0A067NTX6_PLEOS Alpha-galactosidase OS=Pleurotus ostreatus PC15 GN=PLEOSDRAFT_51341 PE=3 SV=1	PF16499/3.2E-10/Alpha galactosidase A	NA
PA_10005350	9.43333	2.82333	-1.61491	GH28	gi|646307143|gb|KDQ28288.1|/0/glycoside hydrolase family 28 protein [Pleurotus ostreatus PC15]	gi|636623722|ref|XM_008044805.1|/1e-135/Trametes versicolor FP-101664 SS1 glycoside hydrolase family 28 protein partial mRNA	Q4WCZ8/4e-70/PGLRX_ASPFU Probable exopolygalacturonase X OS=Neosartorya fumigata (strain ATCC MYA-4609 / Af293 / CBS 101355 / FGSC A1100) GN=pgaX PE=3 SV=2	shs:STEHIDRAFT_150302/3e-134/glycoside hydrolase family 28 protein; K01213 galacturan 1,4-alpha-galacturonidase [EC:3.2.1.67]	YJR153w/9e-11/---	NA	PF00295/2.6E-23/Glycosyl hydrolases family 28	NA
PA_10006729	187.237	82.5333	-1.05083	GH3	gi|646308401|gb|KDQ29545.1|/0/glycoside hydrolase family 3 protein [Pleurotus ostreatus PC15]	gi|597922753|ref|XM_007315659.1|/0.0/Serpula lacrymans var. lacrymans S7.9 glycoside hydrolase family 3 protein (SERLADRAFT_446869), partial mRNA	B0Y3M6/0.0/BGLI_ASPFC Probable beta-glucosidase I OS=Neosartorya fumigata (strain CEA10 / CBS 144.89 / FGSC A1163) GN=bglI PE=3 SV=1	sla:SERLADRAFT_446869/0.0/glycoside hydrolase family 3 protein; K05349 beta-glucosidase [EC:3.2.1.21]	SPBC1683.04/0.0/---	A0A067NRB1/0.0/A0A067NRB1_PLEOS Beta-glucosidase OS=Pleurotus ostreatus PC15 GN=PLEOSDRAFT_1093024 PE=3 SV=1	PF07691/3.5E-11/PA14 domain	biological_process:GO:0000272//polysaccharide catabolic process;molecular_function:GO:0004553//hydrolase activity, hydrolyzing O-glycosyl compounds;
PA_10009170	33.1633	11.4833	-1.06296	GH3	gi|646313078|gb|KDQ34219.1|/0/glycoside hydrolase family 3 protein [Pleurotus ostreatus PC15]	gi|630201612|ref|XM_007853781.1|/0.0/Moniliophthora roreri MCA 2997 glycoside hydrolase family 3 protein partial mRNA	A1CA51/0.0/BGLI_ASPCL Probable beta-glucosidase I OS=Aspergillus clavatus (strain ATCC 1007 / CBS 513.65 / DSM 816 / NCTC 3887 / NRRL 1) GN=bglI PE=3 SV=1	mrr:Moror_2994/0.0/glycoside hydrolase family 3 protein; K05349 beta-glucosidase [EC:3.2.1.21]	SPBC1683.04/0.0/---	A0A067P222/0.0/A0A067P222_PLEOS Glycoside hydrolase family 3 protein OS=Pleurotus ostreatus PC15 GN=PLEOSDRAFT_1031764 PE=4 SV=1	PF07691/2.4E-12/PA14 domain	biological_process:GO:0030245//cellulose catabolic process;molecular_function:GO:0008422//beta-glucosidase activity;
PA_10010575	24.8533	9.09333	-1.19923	GH3	gi|646309039|gb|KDQ30182.1|/0/glycoside hydrolase family 3 protein [Pleurotus ostreatus PC15]	gi|597970212|ref|XM_007360562.1|/0.0/Dichomitus squalens LYAD-421 SS1 beta-xylosidase (DICSQDRAFT_158716), mRNA	Q4WFI6/0.0/BXLB_ASPFU Probable exo-1,4-beta-xylosidase bxlB OS=Neosartorya fumigata (strain ATCC MYA-4609 / Af293 / CBS 101355 / FGSC A1100) GN=bxlB PE=3 SV=1	dsq:DICSQDRAFT_158716/0.0/beta-xylosidase; K15920 beta-D-xylosidase 4 [EC:3.2.1.37]	XF0845/6e-77/---	A0A067P1A5/0.0/A0A067P1A5_PLEOS Glycoside hydrolase family 3 protein OS=Pleurotus ostreatus PC15 GN=PLEOSDRAFT_1035754 PE=4 SV=1	PF00933/7.5E-35/Glycosyl hydrolase family 3 N terminal domain	NA
PA_10005264	43.2667	16.3967	-1.26795	GH31	gi|646307256|gb|KDQ28401.1|/0/glycoside hydrolase family 31 protein [Pleurotus ostreatus PC15]	gi|170115131|ref|XM_001888726.1|/0.0/Laccaria bicolor S238N-H82 glycoside hydrolase family 31 protein partial mRNA	Q9US55/0.0/GLU2A_SCHPO Glucosidase 2 subunit alpha OS=Schizosaccharomyces pombe (strain 972 / ATCC 24843) GN=gls2 PE=3 SV=1	lbc:LACBIDRAFT_255261/0.0/glycoside hydrolase family 31 protein; K05546 alpha 1,3-glucosidase [EC:3.2.1.84]	SPAC1002.03c/0.0/---	NA	PF01055/6.7E-125/Glycosyl hydrolases family 31	biological_process:GO:0005975//carbohydrate metabolic process;GO:0009272//fungal-type cell wall biogenesis;cellular_component:GO:0017177//glucosidase II complex;GO:0005788//endoplasmic reticulum lumen;molecular_function:GO:0030246//carbohydrate binding;GO:0033919//glucan 1,3-alpha-glucosidase activity;
PA_10008933	39.9833	15.5433	-1.14181	GH31	gi|646312782|gb|KDQ33923.1|/0/glycoside hydrolase family 31 protein [Pleurotus ostreatus PC15]	gi|628257987|ref|XM_007731506.1|/0.0/Capronia epimyces CBS 606.96 alpha-D-xyloside xylohydrolase partial mRNA	Q5AW25/0.0/AGDD_EMENI Alpha-xylosidase OS=Emericella nidulans (strain FGSC A4 / ATCC 38163 / CBS 112.46 / NRRL 194 / M139) GN=agdD PE=1 SV=1	spaa:SPAPADRAFT_66805/0.0/YIC1; family 31 glycoside hydrolase; K01811 alpha-D-xyloside xylohydrolase [EC:3.2.1.177]	TM0308/0.0/---	A0A067P0S7/0.0/A0A067P0S7_PLEOS Glycoside hydrolase family 31 protein OS=Pleurotus ostreatus PC15 GN=PLEOSDRAFT_1061529 PE=3 SV=1	PF13802/3.6E-18/Galactose mutarotase-like	NA
PA_10003092	17.85	4.69	-1.77608	GH43	gi|646305538|gb|KDQ26684.1|/0/glycoside hydrolase family 43 protein [Pleurotus ostreatus PC15]	gi|630191855|ref|XM_007850621.1|/1e-173/Moniliophthora roreri MCA 2997 glycosyl family partial mRNA	NA	NA	BH1867/1e-43/---	A0A067NFP8/0.0/A0A067NFP8_PLEOS Glycoside hydrolase family 43 protein OS=Pleurotus ostreatus PC15 GN=PLEOSDRAFT_1084486 PE=3 SV=1	PF04616/2.1E-41/Glycosyl hydrolases family 43	biological_process:GO:0005975//carbohydrate metabolic process;molecular_function:GO:0004553//hydrolase activity, hydrolyzing O-glycosyl compounds;
PA_10008753	63.0567	8.61	-2.74828	GH43	gi|646312544|gb|KDQ33685.1|/0/glycoside hydrolase family 43 protein [Pleurotus ostreatus PC15]	gi|597911754|ref|XM_007303114.1|/1e-134/Stereum hirsutum FP-91666 SS1 glycoside hydrolase family 43 protein (STEHIDRAFT_155983), partial mRNA	Q2U8C6/2e-47/ABNA_ASPOR Probable arabinan endo-1,5-alpha-L-arabinosidase A OS=Aspergillus oryzae (strain ATCC 42149 / RIB 40) GN=abnA PE=3 SV=1	shs:STEHIDRAFT_155983/8e-134/glycoside hydrolase family 43 protein; K06113 arabinan endo-1,5-alpha-L-arabinosidase [EC:3.2.1.99]	BS_abnA/6e-48/---	A0A067P357/0.0/A0A067P357_PLEOS Arabinan endo-1,5-alpha-L-arabinosidase OS=Pleurotus ostreatus PC15 GN=PLEOSDRAFT_1099647 PE=3 SV=1	PF04616/1.9E-28/Glycosyl hydrolases family 43	NA
PA_10010340	46.2067	4.22333	-3.31838	GH43	gi|646309258|gb|KDQ30401.1|/0/glycoside hydrolase family 43 protein [Pleurotus ostreatus PC15]	gi|595774627|ref|XM_007265795.1|/0.0/Fomitiporia mediterranea MF3/22 Arabinanase/levansucrase/invertase (FOMMEDRAFT_106831), mRNA	NA	NA	NA	A0A067P3G0/0.0/A0A067P3G0_PLEOS Glycoside hydrolase family 43 protein OS=Pleurotus ostreatus PC15 GN=PLEOSDRAFT_1074766 PE=3 SV=1	PF04616/1.3E-18/Glycosyl hydrolases family 43	NA
PA_10009412	10.3567	4.22333	-1.16112	GH44	gi|646310256|gb|KDQ31399.1|/0/glycoside hydrolase family 44 protein [Pleurotus ostreatus PC15]	gi|630218703|ref|XM_007859339.1|/0.0/Moniliophthora roreri MCA 2997 endoglucanase partial mRNA	NA	abp:AGABI1DRAFT33905/0.0/AGABI1DRAFT_33905; hypothetical protein; K05286 phosphatidylinositol glycan, class B [EC:2.4.1.-]	NA	A0A067NU26/0.0/A0A067NU26_PLEOS Glycoside hydrolase family 44 protein OS=Pleurotus ostreatus PC15 GN=PLEOSDRAFT_1036707 PE=4 SV=1	PF12891/4.1E-67/Glycoside hydrolase family 44	NA
PA_10009388	73.8133	19.1367	-1.81908	GH45	gi|646310277|gb|KDQ31420.1|/2.32288e-142/glycoside hydrolase family 45 protein [Pleurotus ostreatus PC15]	gi|630211427|ref|XM_007856983.1|/1e-106/Moniliophthora roreri MCA 2997 glycoside hydrolase family 45 protein partial mRNA	P43316/1e-87/GUN5_HUMIN Endoglucanase-5 OS=Humicola insolens PE=1 SV=1	NA	NA	A0A067NWQ3/7e-142/A0A067NWQ3_PLEOS Glycoside hydrolase family 45 protein OS=Pleurotus ostreatus PC15 GN=PLEOSDRAFT_49860 PE=4 SV=1	PF02015/2.4E-73/Glycosyl hydrolase family 45	biological_process:GO:0005975//carbohydrate metabolic process;molecular_function:GO:0008810//cellulase activity;
PA_10002719	38.1733	14.2	-1.29879	GH47	gi|646305967|gb|KDQ27113.1|/0/glycoside hydrolase family 47 protein [Pleurotus ostreatus PC15]	gi|597933015|ref|XM_007320790.1|/0.0/Serpula lacrymans var. lacrymans S7.9 glycoside hydrolase family 47 protein (SERLADRAFT_371777), partial mRNA	Q8H116/3e-79/MNS2_ARATH Mannosyl-oligosaccharide 1,2-alpha-mannosidase MNS2 OS=Arabidopsis thaliana GN=MNS2 PE=1 SV=1	sla:SERLADRAFT_371777/0.0/glycoside hydrolase family 47 protein; K01230 mannosyl-oligosaccharide alpha-1,2-mannosidase [EC:3.2.1.113]	NA	A0A067NGD3/0.0/A0A067NGD3_PLEOS alpha-1,2-Mannosidase OS=Pleurotus ostreatus PC15 GN=PLEOSDRAFT_51326 PE=3 SV=1	PF01532/1.4E-120/Glycosyl hydrolase family 47	molecular_function:GO:0016787//hydrolase activity;
PA_10008385	442.837	1020.91	1.33528	GH5	gi|646312145|gb|KDQ33286.1|/0/glycoside hydrolase family 5 protein [Pleurotus ostreatus PC15]	gi|630176248|ref|XM_007845603.1|/0.0/Moniliophthora roreri MCA 2997 glycoside hydrolase family 5 protein partial mRNA	Q00012/2e-49/MANA_ASPAC Mannan endo-1,4-beta-mannosidase A OS=Aspergillus aculeatus GN=manA PE=1 SV=1	mrr:Moror_6540/0.0/glycoside hydrolase family 5 protein; K19355 mannan endo-1,4-beta-mannosidase [EC:3.2.1.78]	TM1227/3e-26/---	A0A067PBN9/0.0/A0A067PBN9_PLEOS Glycoside hydrolase family 5 protein OS=Pleurotus ostreatus PC15 GN=PLEOSDRAFT_1060958 PE=3 SV=1	PF00150/6.8E-7/Cellulase (glycosyl hydrolase family 5)	biological_process:GO:0008152//metabolic process;molecular_function:GO:0016798//hydrolase activity, acting on glycosyl bonds;
PA_10003857	143.09	8.45667	-3.95966	GH5	gi|646303537|gb|KDQ24685.1|/0/glycoside hydrolase family 5 protein [Pleurotus ostreatus PC15]	gi|189498327|gb|EU716328.1|/1e-177/Volvariella volvacea endoglucanase (egI) mRNA, complete cds	Q12624/8e-115/GUN3_HUMIN Endoglucanase 3 OS=Humicola insolens GN=CMC3 PE=1 SV=1	psq:PUNSTDRAFT_78795/7e-172/endoglucanase; K01179 endoglucanase [EC:3.2.1.4]	RSp0162/8e-61/---	A0A067NCJ9/0.0/A0A067NCJ9_PLEOS Glycoside hydrolase family 5 protein OS=Pleurotus ostreatus PC15 GN=PLEOSDRAFT_1067505 PE=3 SV=1	PF00734/1.4E-12/Fungal cellulose binding domain	NA
PA_10005983	22.2233	9.08667	-1.15949	GH5	gi|646306453|gb|KDQ27598.1|/0/glycoside hydrolase family 5 protein [Pleurotus ostreatus PC15]	gi|82659768|gb|DQ286392.1|/0.0/Armillariella tabescens mannanase mRNA, complete cds	Q4WBS1/3e-84/MANF_ASPFU Mannan endo-1,4-beta-mannosidase F OS=Neosartorya fumigata (strain ATCC MYA-4609 / Af293 / CBS 101355 / FGSC A1100) GN=manF PE=1 SV=2	mrr:Moror_3211/0.0/glycoside hydrolase family 5 protein; K19355 mannan endo-1,4-beta-mannosidase [EC:3.2.1.78]	TM1227/3e-59/---	A0A067NHT6/0.0/A0A067NHT6_PLEOS Glycoside hydrolase family 5 protein OS=Pleurotus ostreatus PC15 GN=PLEOSDRAFT_1041534 PE=3 SV=1	PF00734/3.4E-14/Fungal cellulose binding domain	NA
PA_10007469	22.7733	5.72667	-1.6053	GH5	gi|646307605|gb|KDQ28749.1|/0/glycoside hydrolase family 5 protein [Pleurotus ostreatus PC15]	gi|599108792|ref|XM_007383613.1|/1e-180/Punctularia strigosozonata HHB-11173 SS5 endoglucanase (PUNSTDRAFT_68261), partial mRNA	P07982/1e-153/GUN2_HYPJE Endoglucanase EG-II OS=Hypocrea jecorina GN=egl2 PE=1 SV=1	sla:SERLADRAFT_362327/7e-179/glycoside hydrolase family 5 protein, cellulose binding module 1; K01179 endoglucanase [EC:3.2.1.4]	RSp0162/3e-36/---	A0A067NLC5/0.0/A0A067NLC5_PLEOS Glycoside hydrolase family 5 protein OS=Pleurotus ostreatus PC15 GN=PLEOSDRAFT_1102789 PE=3 SV=1	PF00150/1.0E-52/Cellulase (glycosyl hydrolase family 5)	NA
PA_10005646	66.7167	16.5567	-1.89005	GH51	gi|340003220|emb|CCC33068.1|/0/alfa-L-arabinofuranosidase precursor [Pleurotus sp. &apos;Florida&apos;] &gt;gi|340003222|emb|CCC33069.1| alfa-L-arabinofuranosidase [Pleurotus sp. &apos;Florida&apos;]	gi|340003221|emb|HE565356.1|/0.0/Pleurotus sp. 'Florida' mRNA for alfa-L-arabinofuranosidase (abf gene), strain ATCC MYA-2306	B8NKA3/2e-113/ABFA_ASPFN Probable alpha-L-arabinofuranosidase A OS=Aspergillus flavus (strain ATCC 200026 / FGSC A1120 / NRRL 3357 / JCM 12722 / SRRC 167) GN=abfA PE=3 SV=2	sla:SERLADRAFT_412847/0.0/glycoside hydrolase family 51 protein; K01209 alpha-N-arabinofuranosidase [EC:3.2.1.55]	CAC3436/1e-61/---	NA	PF06964/1.1E-29/Alpha-L-arabinofuranosidase C-terminus	biological_process:GO:0046373//L-arabinose metabolic process;molecular_function:GO:0046556//alpha-L-arabinofuranosidase activity;
PA_10005679	215.077	83.89	-1.22835	GH51	gi|340003220|emb|CCC33068.1|/0/alfa-L-arabinofuranosidase precursor [Pleurotus sp. &apos;Florida&apos;] &gt;gi|340003222|emb|CCC33069.1| alfa-L-arabinofuranosidase [Pleurotus sp. &apos;Florida&apos;]	gi|340003221|emb|HE565356.1|/0.0/Pleurotus sp. 'Florida' mRNA for alfa-L-arabinofuranosidase (abf gene), strain ATCC MYA-2306	Q2U790/4e-88/ABFA_ASPOR Probable alpha-L-arabinofuranosidase A OS=Aspergillus oryzae (strain ATCC 42149 / RIB 40) GN=abfA PE=3 SV=2	sla:SERLADRAFT_412847/0.0/glycoside hydrolase family 51 protein; K01209 alpha-N-arabinofuranosidase [EC:3.2.1.55]	CAC3436/2e-49/---	G0TES6/0.0/G0TES6_PLEOS Alfa-L-arabinofuranosidase OS=Pleurotus sp. 'Florida' GN=abf PE=2 SV=1	PF06964/9.7E-29/Alpha-L-arabinofuranosidase C-terminus	biological_process:GO:0046373//L-arabinose metabolic process;molecular_function:GO:0046556//alpha-L-arabinofuranosidase activity;
PA_10005680	35.4033	11.3167	-1.51971	GH51	gi|340003220|emb|CCC33068.1|/0/alfa-L-arabinofuranosidase precursor [Pleurotus sp. &apos;Florida&apos;] &gt;gi|340003222|emb|CCC33069.1| alfa-L-arabinofuranosidase [Pleurotus sp. &apos;Florida&apos;]	gi|340003221|emb|HE565356.1|/0.0/Pleurotus sp. 'Florida' mRNA for alfa-L-arabinofuranosidase (abf gene), strain ATCC MYA-2306	Q2U790/1e-107/ABFA_ASPOR Probable alpha-L-arabinofuranosidase A OS=Aspergillus oryzae (strain ATCC 42149 / RIB 40) GN=abfA PE=3 SV=2	sla:SERLADRAFT_412847/0.0/glycoside hydrolase family 51 protein; K01209 alpha-N-arabinofuranosidase [EC:3.2.1.55]	CAC3436/2e-63/---	G0TES6/0.0/G0TES6_PLEOS Alfa-L-arabinofuranosidase OS=Pleurotus sp. 'Florida' GN=abf PE=2 SV=1	PF06964/2.5E-25/Alpha-L-arabinofuranosidase C-terminus	biological_process:GO:0046373//L-arabinose metabolic process;molecular_function:GO:0046556//alpha-L-arabinofuranosidase activity;
PA_10008892	80.46	27.4233	-1.34922	GH55	gi|646312740|gb|KDQ33881.1|/0/glycoside hydrolase family 55 protein [Pleurotus ostreatus PC15]	gi|74271750|dbj|AB192345.1|/0.0/Lentinula edodes exg2 mRNA for exo-beta-1,3-glucanase, complete cds	P49426/0.0/EXG1_COCCA Glucan 1,3-beta-glucosidase OS=Cochliobolus carbonum GN=EXG1 PE=1 SV=1	afm:AFUA_6G13270/0.0/exo-beta-1,3-glucanase (EC:3.2.1.58); K01210 glucan 1,3-beta-glucosidase [EC:3.2.1.58]	NA	A0A067PDE2/0.0/A0A067PDE2_PLEOS Glycoside hydrolase family 55 protein OS=Pleurotus ostreatus PC15 GN=PLEOSDRAFT_37178 PE=4 SV=1	PF12708/1.9E-83/Pectate lyase superfamily protein	molecular_function:GO:0016787//hydrolase activity;
PA_10007873	19.0733	0.89	-4.00159	GH6	gi|646311581|gb|KDQ32722.1|/0/glycoside hydrolase family 6 protein [Pleurotus ostreatus PC15]	gi|16304332|gb|AY050517.1|/0.0/Pleurotus sajor-caju cellobiohydrolase II mRNA, complete cds	P49075/0.0/GUX3_AGABI Exoglucanase 3 OS=Agaricus bisporus GN=cel3 PE=1 SV=1	hir:HETIRDRAFT_60114/0.0/gh6.1; glycoside hydrolase family 6 protein; K19668 cellulose 1,4-beta-cellobiosidase [EC:3.2.1.91]	RSp0583/2e-62/---	A0A067P8I0/0.0/A0A067P8I0_PLEOS Glucanase OS=Pleurotus ostreatus PC15 GN=PLEOSDRAFT_1073165 PE=3 SV=1	PF01341/7.4E-106/Glycosyl hydrolases family 6	biological_process:GO:0030245//cellulose catabolic process;cellular_component:GO:0005576//extracellular region;molecular_function:GO:0030248//cellulose binding;GO:0004553//hydrolase activity, hydrolyzing O-glycosyl compounds;
PA_10008451	195.373	29.4367	-2.60323	GH6	gi|646312221|gb|KDQ33362.1|/0/glycoside hydrolase family 6 protein [Pleurotus ostreatus PC15]	gi|49333366|gb|AY559104.1|/0.0/Volvariella volvacea cellobiohydrolase II-I (cbhII-I) mRNA, complete cds	P49075/0.0/GUX3_AGABI Exoglucanase 3 OS=Agaricus bisporus GN=cel3 PE=1 SV=1	hir:HETIRDRAFT_60114/0.0/gh6.1; glycoside hydrolase family 6 protein; K19668 cellulose 1,4-beta-cellobiosidase [EC:3.2.1.91]	RSp0583/1e-60/---	A0A067PAE2/0.0/A0A067PAE2_PLEOS Glucanase OS=Pleurotus ostreatus PC15 GN=PLEOSDRAFT_48333 PE=3 SV=1	PF01341/1.8E-109/Glycosyl hydrolases family 6	biological_process:GO:0030245//cellulose catabolic process;cellular_component:GO:0005576//extracellular region;molecular_function:GO:0030248//cellulose binding;GO:0004553//hydrolase activity, hydrolyzing O-glycosyl compounds;
PA_10000467	4.00667	7.42333	1.03211	GH7	gi|646310921|gb|KDQ32063.1|/0/glycoside hydrolase family 7 protein [Pleurotus ostreatus PC15]	gi|768973451|dbj|LC034188.1|/1e-135/Pleurotus eryngii PEcbh RNA for cellobiohydrolase, complete cds	Q8NK02/2e-124/CBHB_EMENI 1,4-beta-D-glucan cellobiohydrolase B OS=Emericella nidulans (strain FGSC A4 / ATCC 38163 / CBS 112.46 / NRRL 194 / M139) GN=cbhB PE=3 SV=1	dsq:DICSQDRAFT_100956/1e-131/cellobiohydrolaseI; K01225 cellulose 1,4-beta-cellobiosidase [EC:3.2.1.91]	NA	A0A067NVF8/0.0/A0A067NVF8_PLEOS Glucanase OS=Pleurotus ostreatus PC15 GN=PLEOSDRAFT_1035386 PE=3 SV=1	PF00840/2.0E-131/Glycosyl hydrolase family 7	NA
PA_10006847	147.457	52.94	-1.34815	GH7	gi|646308275|gb|KDQ29419.1|/0/glycoside hydrolase family 7 protein [Pleurotus ostreatus PC15]	gi|768973451|dbj|LC034188.1|/0.0/Pleurotus eryngii PEcbh RNA for cellobiohydrolase, complete cds	P13860/0.0/GUX1_PHACH Exoglucanase 1 OS=Phanerochaete chrysosporium GN=CBH1 PE=2 SV=1	mrr:Moror_4757/0.0/cellulose -beta-cellobiosidase precursor; K01225 cellulose 1,4-beta-cellobiosidase [EC:3.2.1.91]	NA	A0A067NNE2/0.0/A0A067NNE2_PLEOS Glucanase OS=Pleurotus ostreatus PC15 GN=PLEOSDRAFT_1039666 PE=3 SV=1	PF00840/3.7E-208/Glycosyl hydrolase family 7	NA
PA_10006850	293.28	13.2133	-4.33248	GH7	gi|646308275|gb|KDQ29419.1|/0/glycoside hydrolase family 7 protein [Pleurotus ostreatus PC15]	gi|768973451|dbj|LC034188.1|/0.0/Pleurotus eryngii PEcbh RNA for cellobiohydrolase, complete cds	P13860/0.0/GUX1_PHACH Exoglucanase 1 OS=Phanerochaete chrysosporium GN=CBH1 PE=2 SV=1	hir:HETIRDRAFT_38802/0.0/gh7.1; glycoside hydrolase family 7 protein; K01225 cellulose 1,4-beta-cellobiosidase [EC:3.2.1.91]	NA	A0A067NNE2/0.0/A0A067NNE2_PLEOS Glucanase OS=Pleurotus ostreatus PC15 GN=PLEOSDRAFT_1039666 PE=3 SV=1	PF00840/1.2E-208/Glycosyl hydrolase family 7	NA
PA_10007343	156.537	19.37	-2.31295	GH7	gi|146350520|emb|CAK18913.1|/0/cellulose 1,4-beta-cellobiosidase precursor [Pleurotus sp. &apos;Florida&apos;]	gi|768973451|dbj|LC034188.1|/0.0/Pleurotus eryngii PEcbh RNA for cellobiohydrolase, complete cds	P13860/0.0/GUX1_PHACH Exoglucanase 1 OS=Phanerochaete chrysosporium GN=CBH1 PE=2 SV=1	hir:HETIRDRAFT_38802/0.0/gh7.1; glycoside hydrolase family 7 protein; K01225 cellulose 1,4-beta-cellobiosidase [EC:3.2.1.91]	NA	A5AA53/0.0/A5AA53_PLEOS Glucanase OS=Pleurotus ostreatus GN=cbhI-1 PE=3 SV=1	PF00840/2.3E-212/Glycosyl hydrolase family 7	NA
PA_10006825	4.88667	20.5633	2.18563	GH7	gi|646308302|gb|KDQ29446.1|/0/glycoside hydrolase family 7 protein [Pleurotus ostreatus PC15]	gi|768973451|dbj|LC034188.1|/0.0/Pleurotus eryngii PEcbh RNA for cellobiohydrolase, complete cds	P13860/0.0/GUX1_PHACH Exoglucanase 1 OS=Phanerochaete chrysosporium GN=CBH1 PE=2 SV=1	hir:HETIRDRAFT_38802/0.0/gh7.1; glycoside hydrolase family 7 protein; K01225 cellulose 1,4-beta-cellobiosidase [EC:3.2.1.91]	NA	A0A067P0Q4/0.0/A0A067P0Q4_PLEOS Glucanase OS=Pleurotus ostreatus PC15 GN=PLEOSDRAFT_27620 PE=3 SV=1	PF00734/3.3E-12/Fungal cellulose binding domain	NA
PA_10007290	48.33	10.7433	-2.0483	GH7	gi|646307798|gb|KDQ28942.1|/0/glycoside hydrolase family 7 protein [Pleurotus ostreatus PC15]	gi|46395331|dbj|AB177377.1|/0.0/Irpex lacteus cex1 mRNA for cellobiohydrolase, complete cds	P13860/0.0/GUX1_PHACH Exoglucanase 1 OS=Phanerochaete chrysosporium GN=CBH1 PE=2 SV=1	adl:AURDEDRAFT_54488/0.0/Exocellobiohydrolase; K01225 cellulose 1,4-beta-cellobiosidase [EC:3.2.1.91]	NA	A0A067NXR2/0.0/A0A067NXR2_PLEOS Glucanase OS=Pleurotus ostreatus PC15 GN=PLEOSDRAFT_1075797 PE=3 SV=1	PF00840/1.1E-200/Glycosyl hydrolase family 7	NA
PA_10007301	88.79	25.9133	-2.48234	GH7	gi|646307798|gb|KDQ28942.1|/0/glycoside hydrolase family 7 protein [Pleurotus ostreatus PC15]	gi|46395331|dbj|AB177377.1|/0.0/Irpex lacteus cex1 mRNA for cellobiohydrolase, complete cds	P13860/0.0/GUX1_PHACH Exoglucanase 1 OS=Phanerochaete chrysosporium GN=CBH1 PE=2 SV=1	adl:AURDEDRAFT_54488/0.0/Exocellobiohydrolase; K01225 cellulose 1,4-beta-cellobiosidase [EC:3.2.1.91]	NA	A0A067NXR2/0.0/A0A067NXR2_PLEOS Glucanase OS=Pleurotus ostreatus PC15 GN=PLEOSDRAFT_1075797 PE=3 SV=1	PF00734/3.2E-13/Fungal cellulose binding domain	NA
PA_10001677	65.3467	193.87	1.66664	GH71	gi|646301917|gb|KDQ23067.1|/1.49975e-166/glycoside hydrolase family 71 protein [Pleurotus ostreatus PC15]	gi|630361244|ref|XM_007871706.1|/1e-114/Gloeophyllum trabeum ATCC 11539 glycoside hydrolase partial mRNA	O13716/2e-55/AGN1_SCHPO Glucan endo-1,3-alpha-glucosidase agn1 OS=Schizosaccharomyces pombe (strain 972 / ATCC 24843) GN=agn1 PE=1 SV=2	gtr:GLOTRDRAFT_48902/4e-114/glycoside hydrolase; K08254 glucan endo-1,3-alpha-glucosidase [EC:3.2.1.59]	NA	A0A067NG20/5e-166/A0A067NG20_PLEOS Glycoside hydrolase family 71 protein OS=Pleurotus ostreatus PC15 GN=PLEOSDRAFT_1079320 PE=4 SV=1	PF03659/1.2E-42/Glycosyl hydrolase family 71	NA
PA_10001817	16.6567	3.33	-1.82671	GH71	gi|646302056|gb|KDQ23206.1|/0/glycoside hydrolase family 71 protein [Pleurotus ostreatus PC15]	gi|599384951|ref|XM_007397818.1|/1e-123/Phanerochaete carnosa HHB-10118-sp glycoside hydrolase family 71 protein (PHACADRAFT_147502), mRNA	O13716/6e-56/AGN1_SCHPO Glucan endo-1,3-alpha-glucosidase agn1 OS=Schizosaccharomyces pombe (strain 972 / ATCC 24843) GN=agn1 PE=1 SV=2	pco:PHACADRAFT_147502/1e-125/glycoside hydrolase family 71 protein; K08254 glucan endo-1,3-alpha-glucosidase [EC:3.2.1.59]	NA	A0A067NHF0/0.0/A0A067NHF0_PLEOS Glycoside hydrolase family 71 protein OS=Pleurotus ostreatus PC15 GN=PLEOSDRAFT_62328 PE=4 SV=1	PF03659/3.3E-84/Glycosyl hydrolase family 71	NA
PA_10009675	10.38	23.3367	1.28551	GH71	gi|749760518|gb|KII85447.1|/0/glycoside hydrolase family 71 protein [Plicaturopsis crispa FD-325 SS-3]	gi|630361244|ref|XM_007871706.1|/1e-175/Gloeophyllum trabeum ATCC 11539 glycoside hydrolase partial mRNA	O13716/2e-85/AGN1_SCHPO Glucan endo-1,3-alpha-glucosidase agn1 OS=Schizosaccharomyces pombe (strain 972 / ATCC 24843) GN=agn1 PE=1 SV=2	gtr:GLOTRDRAFT_48902/6e-175/glycoside hydrolase; K08254 glucan endo-1,3-alpha-glucosidase [EC:3.2.1.59]	NA	S7RG26/1e-174/S7RG26_GLOTA Glycoside hydrolase OS=Gloeophyllum trabeum (strain ATCC 11539 / FP-39264 / Madison 617) GN=GLOTRDRAFT_48902 PE=4 SV=1	PF03659/3.5E-115/Glycosyl hydrolase family 71	NA
PA_10010145	68.83	1.99333	-4.98326	GH74	gi|646309469|gb|KDQ30612.1|/0/glycoside hydrolase family 74 protein [Pleurotus ostreatus PC15]	gi|597968398|ref|XM_007360102.1|/0.0/Dichomitus squalens LYAD-421 SS1 Oligoxyloglucan reducing end-specific cellobiohydrolase (DICSQDRAFT_130877), mRNA	Q7Z9M8/0.0/XG74_HYPJQ Xyloglucanase OS=Hypocrea jecorina (strain QM6a) GN=cel74a PE=1 SV=1	dsq:DICSQDRAFT_130877/0.0/Oligoxyloglucan reducing end-specific cellobiohydrolase; K18578 xyloglucan-specific exo-beta-1,4-glucanase [EC:3.2.1.155]	NA	A0A067P2G6/0.0/A0A067P2G6_PLEOS Glycoside hydrolase family 74 protein OS=Pleurotus ostreatus PC15 GN=PLEOSDRAFT_1111407 PE=4 SV=1	PF00734/1.4E-9/Fungal cellulose binding domain	NA
PA_10007523	44.9833	165.76	2.00777	GH92	gi|646307545|gb|KDQ28689.1|/0/glycoside hydrolase family 92 protein [Pleurotus ostreatus PC15]	gi|597995706|ref|XM_007367133.1|/0.0/Dichomitus squalens LYAD-421 SS1 glycoside hydrolase family 92 protein (DICSQDRAFT_107981), mRNA	D4ATR3/8e-36/A7629_ARTBC Uncharacterized secreted glycosidase ARB_07629 OS=Arthroderma benhamiae (strain ATCC MYA-4681 / CBS 112371) GN=ARB_07629 PE=1 SV=1	NA	XF0842/4e-81/---	A0A067NL54/0.0/A0A067NL54_PLEOS Glycoside hydrolase family 92 protein OS=Pleurotus ostreatus PC15 GN=PLEOSDRAFT_1063499 PE=4 SV=1	PF07971/1.5E-151/Glycosyl hydrolase family 92	NA
PA_10001925	48.9633	19.7067	-1.17664	GH95	gi|646302160|gb|KDQ23310.1|/0/glycoside hydrolase family 95 protein [Pleurotus ostreatus PC15]	gi|695578172|ref|XM_009554555.1|/0.0/Heterobasidion irregulare TC 32-1 glycoside hydrolase family 95 protein partial mRNA	A2R797/4e-176/AFCA_ASPNC Probable alpha-fucosidase A OS=Aspergillus niger (strain CBS 513.88 / FGSC A1513) GN=afcA PE=3 SV=1	hir:HETIRDRAFT_181224/0.0/glycoside hydrolase family 95 protein; K15923 alpha-L-fucosidase 2 [EC:3.2.1.51]	NA	A0A067N8Q5/0.0/A0A067N8Q5_PLEOS Glycoside hydrolase family 95 protein OS=Pleurotus ostreatus PC15 GN=PLEOSDRAFT_171323 PE=4 SV=1	PF14498/8.3E-41/Glycosyl hydrolase family 65, N-terminal domain	molecular_function:GO:0016787//hydrolase activity;
PA_10009815	69.8233	29.98	-1.09206	GT21	gi|646309824|gb|KDQ30967.1|/0/glycosyltransferase family 21 protein [Pleurotus ostreatus PC15]	gi|630172748|ref|XM_007844463.1|/0.0/Moniliophthora roreri MCA 2997 glycosyltransferase family 21 protein partial mRNA	J9W453/1e-127/CEGT_CRYNH Ceramide glucosyltransferase OS=Cryptococcus neoformans var. grubii serotype A (strain H99 / ATCC 208821 / CBS 10515 / FGSC 9487) GN=GCS1 PE=1 SV=1	mrr:Moror_469/0.0/glycosyltransferase family 21 protein; K00720 ceramide glucosyltransferase [EC:2.4.1.80]	mlr5650/3e-24/---	A0A067P3H7/0.0/A0A067P3H7_PLEOS Glycosyltransferase family 21 protein OS=Pleurotus ostreatus PC15 GN=PLEOSDRAFT_1075181 PE=4 SV=1	PF13506/1.7E-19/Glycosyl transferase family 21	cellular_component:GO:0016021//integral component of membrane;molecular_function:GO:0016757//transferase activity, transferring glycosyl groups;
PA_10006644	13.59	36.0433	1.5402	GT22	gi|646308492|gb|KDQ29636.1|/0/glycosyltransferase family 22 protein [Pleurotus ostreatus PC15]	gi|630207198|ref|XM_007855608.1|/1e-141/Moniliophthora roreri MCA 2997 glycosyltransferase family 22 protein partial mRNA	Q9VH78/2e-65/ALG12_DROME Probable Dol-P-Man:Man(7)GlcNAc(2)-PP-Dol alpha-1,6-mannosyltransferase OS=Drosophila melanogaster GN=CG8412 PE=2 SV=1	mrr:Moror_3413/1e-141/glycosyltransferase family 22 protein; K03847 alpha-1,6-mannosyltransferase [EC:2.4.1.260]	NA	A0A067P188/0.0/A0A067P188_PLEOS Glycosyltransferase family 22 protein OS=Pleurotus ostreatus PC15 GN=PLEOSDRAFT_1103647 PE=4 SV=1	PF03901/7.6E-35/Alg9-like mannosyltransferase family	NA
PA_10000931	15.52	5.55667	-1.3436	GT24	gi|646310640|gb|KDQ31782.1|/0/glycosyltransferase family 24 protein [Pleurotus ostreatus PC15]	gi|630196981|ref|XM_007852276.1|/0.0/Moniliophthora roreri MCA 2997 udp-glucose:glycoprotein glucosyltransferase partial mRNA	Q09140/0.0/UGGG_SCHPO UDP-glucose:glycoprotein glucosyltransferase OS=Schizosaccharomyces pombe (strain 972 / ATCC 24843) GN=gpt1 PE=1 SV=2	mrr:Moror_7711/0.0/udp-glucose:glycoprotein glucosyltransferase; K11718 UDP-glucose:glycoprotein glucosyltransferase [EC:2.4.1.-]	NA	A0A067P5W8/0.0/A0A067P5W8_PLEOS Glycosyltransferase family 24 protein OS=Pleurotus ostreatus PC15 GN=PLEOSDRAFT_1061882 PE=4 SV=1	PF01501/7.4E-6/Glycosyl transferase family 8	NA
PA_10005962	4.69667	13.3733	1.31734	GT49	gi|646306473|gb|KDQ27618.1|/0/glycosyltransferase family 49 protein [Pleurotus ostreatus PC15]	gi|302680990|ref|XM_003030131.1|/1e-177/Schizophyllum commune H4-8 glycosyltransferase family 49 protein, mRNA	Q6P7A1/7e-27/LARG2_RAT Glycosyltransferase-like protein LARGE2 OS=Rattus norvegicus GN=Gyltl1b PE=2 SV=1	scm:SCHCODRAFT_57714/6e-178/glycosyltransferase family 49 protein; K09668 glycosyltransferase-like protein LARGE	NA	A0A067NHV2/0.0/A0A067NHV2_PLEOS Glycosyltransferase family 49 protein OS=Pleurotus ostreatus PC15 GN=PLEOSDRAFT_28855 PE=4 SV=1	PF13896/2.8E-55/Glycosyl-transferase for dystroglycan	NA
PA_10008549	33.58	13.0833	-1.22881	PL1	gi|646312319|gb|KDQ33460.1|/0/polysaccharide lyase family 1 protein [Pleurotus ostreatus PC15]	gi|630207025|ref|XM_007855551.1|/0.0/Moniliophthora roreri MCA 2997 pectate lyase partial mRNA	B0XMA2/0.0/PLYC_ASPFC Probable pectate lyase C OS=Neosartorya fumigata (strain CEA10 / CBS 144.89 / FGSC A1163) GN=plyC PE=3 SV=1	NA	NA	A0A067P2J9/0.0/A0A067P2J9_PLEOS Polysaccharide lyase family 1 protein OS=Pleurotus ostreatus PC15 GN=PLEOSDRAFT_48269 PE=4 SV=1	NA	NA
PA_10009024	430.227	126.033	-1.64386	PL14	gi|646312906|gb|KDQ34047.1|/0/polysaccharide lyase family 14 protein [Pleurotus ostreatus PC15]	gi|695535660|ref|XM_009543460.1|/1e-133/Heterobasidion irregulare TC 32-1 polysaccharide lyase family 14 protein (psl14.1), partial mRNA	NA	NA	NA	A0A067PC93/0.0/A0A067PC93_PLEOS Polysaccharide lyase family 14 protein OS=Pleurotus ostreatus PC15 GN=PLEOSDRAFT_1110825 PE=4 SV=1	NA	NA
PA_10004193	12.2967	24.25	1.10576	PL4	gi|646301075|gb|KDQ22226.1|/0/polysaccharide lyase family 4 protein [Pleurotus ostreatus PC15]	gi|630192140|ref|XM_007850714.1|/0.0/Moniliophthora roreri MCA 2997 polysaccharide lyase family 4 protein partial mRNA	Q0CVU1/1e-164/RGLA_ASPTN Probable rhamnogalacturonate lyase A OS=Aspergillus terreus (strain NIH 2624 / FGSC A1156) GN=rglA PE=3 SV=2	mrr:Moror_10566/0.0/polysaccharide lyase family 4 protein; K18195 rhamnogalacturonan endolyase [EC:4.2.2.23]	NA	A0A067NEL9/0.0/A0A067NEL9_PLEOS Polysaccharide lyase family 4 protein OS=Pleurotus ostreatus PC15 GN=PLEOSDRAFT_1109346 PE=4 SV=1	PF09284/2.3E-7/Rhamnogalacturonan lyase B, N-terminal	molecular_function:GO:0016829//lyase activity;
